# Supplementary material
Source: MDPI journal article supplement (https://www.mdpi.com/1999-4907/15/5/835)
Supplement: s1 [file s1]

## Supplementary Files: Tables and figures

**Table S1. Statistics of the mitogenome assembly in *M. elegans*.**

| Statistical list               | Number     |
|--------------------------------|------------|
| Number of raw reads            | 1,642      |
| Total length of raw reads (bp) | 25,062,966 |
| Average raw read length (bp)   | 15,264     |
| Longest raw read (bp)          | 21,406     |
| Number of assembled contigs    | 21         |
| Longest contig (bp)            | 93,797     |
| Number of read depth           | 56×        |
| Total number(>=15 kb)          | 878        |
| Total number(>=10 kb)          | 1,642      |

**Table S2. Basic information of *M. elegans* mitogenome.**

| NCBI Accession number | Contigs      | Type     | Length     | GC content % |
|-----------------------|--------------|----------|------------|--------------|
| OP429117 - OP429118   | Molecule 1-2 | Branched | 416,354 bp | 44.33        |
| OP429117              | Molecule 1   | circular | 221,573 bp | 44.32        |
| OP429118              | Molecule 2   | circular | 194,781 bp | 44.33        |

**Table S3. Relative synonymous codon usage in *M. elegans* mitogenome.**

| Amino | Codon 1<br>RSCU | Codon 2<br>RSCU | Codon 3<br>RSCU | Codon 4<br>RSCU | Codon 5<br>RSCU | Codon 6<br>RSCU |
|-------|-----------------|-----------------|-----------------|-----------------|-----------------|-----------------|
| Ala   | GCU<br>1.63     | GCA<br>0.98     | GCC<br>0.78     | GCG<br>0.50     |                 |                 |
| Arg   | AGA<br>1.46     | CGA<br>1.35     | CGU<br>1.18     | AGG<br>0.72     | CGG<br>0.69     | CGC<br>0.61     |
| Asn   | AAU<br>1.32     | AAC<br>0.68     |                 |                 |                 |                 |
| Asp   | GAU<br>1.41     | GAC<br>0.59     |                 |                 |                 |                 |
| Cys   | UGU<br>1.2      | UGC<br>0.8      |                 |                 |                 |                 |
| End   | UAA<br>1.61     | UAG<br>1.07     | UGA<br>0.32     |                 |                 |                 |
| Gln   | CAA<br>1.53     | CAG<br>0.47     |                 |                 |                 |                 |
| Glu   | GAA             | GAG             |                 |                 |                 |                 |

|     |     |      |      |      |      |      |      |
|-----|-----|------|------|------|------|------|------|
|     |     | 1.39 | 0.61 |      |      |      |      |
| Gly | GGA | GGU  | GGG  | GGC  |      |      |      |
|     |     | 1.52 | 1.32 | 0.75 | 0.51 |      |      |
| His | CAU | CAC  |      |      |      |      |      |
|     |     | 1.54 | 0.46 |      |      |      |      |
| Ile | AUU | AUA  | AUC  |      |      |      |      |
|     |     | 1.34 | 0.87 | 0.79 |      |      |      |
| Leu | UUA | CUU  | UUG  | CUA  | CUC  | CUG  |      |
|     |     | 1.6  | 1.29 | 1.18 | 0.89 | 0.56 | 0.48 |
| Lys | AAA | AAG  |      |      |      |      |      |
|     |     | 1.29 | 0.71 |      |      |      |      |
| Met | AUG |      |      |      |      |      |      |
|     |     | 1.0  |      |      |      |      |      |
| Phe | UUU | UUC  |      |      |      |      |      |
|     |     | 1.23 | 0.77 |      |      |      |      |
| Pro | CCU | CCA  | CCC  | CCG  |      |      |      |
|     |     | 1.59 | 1.09 | 0.73 | 0.58 |      |      |
| Ser | UCU | UCA  | AGU  | UCC  | UCG  | AGC  |      |
|     |     | 1.49 | 1.16 | 1.06 | 1.09 | 0.87 | 0.66 |
| Thr | ACU | ACC  | ACA  | ACG  |      |      |      |
|     |     | 1.51 | 0.99 | 0.98 | 0.52 |      |      |
| Trp | UGG |      |      |      |      |      |      |
|     |     | 1.0  |      |      |      |      |      |
| Tyr | UAU | UAC  |      |      |      |      |      |
|     |     | 1.48 | 0.52 |      |      |      |      |
| Val | GUU | GUA  | GUG  | GUC  |      |      |      |
|     |     | 1.27 | 1.25 | 0.83 | 0.66 |      |      |

**Table S4. SSRs in the mitogenome of M1.**

| Mitogenome | SSR nr. | SSR type | SSR      | size | start | end   |
|------------|---------|----------|----------|------|-------|-------|
| M1         | 1       | p1       | (T)11    | 11   | 1965  | 1975  |
| M1         | 2       | p1       | (T)10    | 10   | 3984  | 3993  |
| M1         | 3       | p4       | (TAAG)3  | 12   | 7554  | 7565  |
| M1         | 4       | p1       | (G)10    | 10   | 12980 | 12989 |
| M1         | 5       | p5       | (GGATG)3 | 15   | 15878 | 15892 |
| M1         | 6       | p2       | (TC)5    | 10   | 17368 | 17377 |
| M1         | 7       | p2       | (TA)5    | 10   | 24902 | 24911 |
| M1         | 8       | p1       | (A)11    | 11   | 29071 | 29081 |
| M1         | 9       | p1       | (T)10    | 10   | 33542 | 33551 |
| M1         | 10      | p4       | (TTAA)3  | 12   | 38042 | 38053 |
| M1         | 11      | p4       | (TCAA)3  | 12   | 39486 | 39497 |

|    |    |    |           |    |        |        |
|----|----|----|-----------|----|--------|--------|
| M1 | 12 | p2 | (AG)6     | 12 | 41642  | 41653  |
| M1 | 13 | p3 | (TTC)4    | 12 | 42166  | 42177  |
| M1 | 14 | p4 | (TCTT)3   | 12 | 52401  | 52412  |
| M1 | 15 | p4 | (AAGG)3   | 12 | 52953  | 52964  |
| M1 | 16 | p4 | (ACTG)3   | 12 | 66144  | 66155  |
| M1 | 17 | p4 | (TCGC)3   | 12 | 70539  | 70550  |
| M1 | 18 | p2 | (AG)5     | 10 | 70593  | 70602  |
| M1 | 19 | p6 | (TCGTCT)3 | 18 | 70667  | 70684  |
| M1 | 20 | p4 | (GGCT)3   | 12 | 76673  | 76684  |
| M1 | 21 | p1 | (T)10     | 10 | 78798  | 78807  |
| M1 | 22 | p1 | (A)11     | 11 | 78913  | 78923  |
| M1 | 23 | p4 | (AAGA)3   | 12 | 83737  | 83748  |
| M1 | 24 | p2 | (AG)5     | 10 | 88567  | 88576  |
| M1 | 25 | p1 | (A)10     | 10 | 97596  | 97605  |
| M1 | 26 | p1 | (A)11     | 11 | 97644  | 97654  |
| M1 | 27 | p1 | (A)10     | 10 | 100261 | 100270 |
| M1 | 28 | p1 | (T)11     | 11 | 102816 | 102826 |
| M1 | 29 | p4 | (AATG)3   | 12 | 103566 | 103577 |
| M1 | 30 | p1 | (A)10     | 10 | 104403 | 104412 |
| M1 | 31 | p1 | (A)10     | 10 | 105383 | 105392 |
| M1 | 32 | p1 | (A)11     | 11 | 106285 | 106295 |
| M1 | 33 | p4 | (AAGA)3   | 12 | 106838 | 106849 |
| M1 | 34 | p1 | (A)11     | 11 | 106995 | 107005 |
| M1 | 35 | p2 | (AT)17    | 34 | 108842 | 108875 |
| M1 | 36 | p2 | (AT)5     | 10 | 109489 | 109498 |
| M1 | 37 | p2 | (TA)5     | 10 | 119379 | 119388 |
| M1 | 38 | p4 | (GAAA)3   | 12 | 124315 | 124326 |
| M1 | 39 | p4 | (CTTC)3   | 12 | 125809 | 125820 |
| M1 | 40 | p4 | (GAAA)4   | 16 | 127445 | 127460 |
| M1 | 41 | p4 | (AAGC)3   | 12 | 127780 | 127791 |
| M1 | 42 | p4 | (TTTA)3   | 12 | 143258 | 143269 |
| M1 | 43 | p3 | (AAT)4    | 12 | 143785 | 143796 |
| M1 | 44 | p1 | (T)10     | 10 | 144210 | 144219 |
| M1 | 45 | p3 | (TTC)4    | 12 | 151681 | 151692 |
| M1 | 46 | p2 | (CT)5     | 10 | 153524 | 153533 |
| M1 | 47 | p4 | (AGAA)3   | 12 | 155405 | 155416 |
| M1 | 48 | p4 | (TACT)3   | 12 | 161343 | 161354 |
| M1 | 49 | p4 | (TTGC)3   | 12 | 167209 | 167220 |
| M1 | 50 | p1 | (T)11     | 11 | 173751 | 173761 |
| M1 | 51 | p1 | (A)12     | 12 | 176187 | 176198 |
| M1 | 52 | p2 | (CT)5     | 10 | 177895 | 177904 |
| M1 | 53 | p3 | (ATA)4    | 12 | 179997 | 180008 |

|    |    |    |          |    |        |        |
|----|----|----|----------|----|--------|--------|
| M1 | 54 | p1 | (T)10    | 10 | 180474 | 180483 |
| M1 | 55 | p5 | (AAGTG)3 | 15 | 180655 | 180669 |
| M1 | 56 | p4 | (GAAA)3  | 12 | 180855 | 180866 |
| M1 | 57 | p4 | (ATGA)3  | 12 | 181948 | 181959 |
| M1 | 58 | p2 | (CT)5    | 10 | 182672 | 182681 |
| M1 | 59 | p1 | (T)11    | 11 | 183300 | 183310 |
| M1 | 60 | p4 | (CGCC)3  | 12 | 210107 | 210118 |
| M1 | 61 | p2 | (AG)5    | 10 | 221353 | 221362 |

**Table S5. SSRs in the mitogenome of M2.**

| Mitogenome | SSR nr. | SSR type | SSR     | size | start  | end    |
|------------|---------|----------|---------|------|--------|--------|
| M2         | 1       | p4       | (CGCC)3 | 12   | 8205   | 8216   |
| M2         | 2       | p2       | (AG)5   | 10   | 19451  | 19460  |
| M2         | 3       | p4       | (TCTT)3 | 12   | 27687  | 27698  |
| M2         | 4       | p4       | (ATTC)3 | 12   | 29983  | 29994  |
| M2         | 5       | p1       | (A)10   | 10   | 40961  | 40970  |
| M2         | 6       | p1       | (T)15   | 15   | 42925  | 42939  |
| M2         | 7       | p4       | (GAAA)3 | 12   | 45860  | 45871  |
| M2         | 8       | p1       | (A)10   | 10   | 50398  | 50407  |
| M2         | 9       | p3       | (ATA)4  | 12   | 53775  | 53786  |
| M2         | 10      | p2       | (TA)5   | 10   | 58680  | 58689  |
| M2         | 11      | p1       | (T)11   | 11   | 59655  | 59665  |
| M2         | 12      | p1       | (T)10   | 10   | 63501  | 63510  |
| M2         | 13      | p4       | (GGAT)3 | 12   | 63791  | 63802  |
| M2         | 14      | p4       | (GAAA)3 | 12   | 64439  | 64450  |
| M2         | 15      | p3       | (GAA)4  | 12   | 66734  | 66745  |
| M2         | 16      | p2       | (AG)6   | 12   | 77553  | 77564  |
| M2         | 17      | p1       | (T)10   | 10   | 80302  | 80311  |
| M2         | 18      | p1       | (T)10   | 10   | 81853  | 81862  |
| M2         | 19      | p1       | (T)11   | 11   | 83784  | 83794  |
| M2         | 20      | p1       | (A)10   | 10   | 96600  | 96609  |
| M2         | 21      | p1       | (A)12   | 12   | 97324  | 97335  |
| M2         | 22      | p1       | (A)10   | 10   | 103178 | 103187 |
| M2         | 23      | p1       | (A)10   | 10   | 103189 | 103198 |
| M2         | 24      | p1       | (T)10   | 10   | 105527 | 105536 |
| M2         | 25      | p2       | (CT)5   | 10   | 107946 | 107955 |
| M2         | 26      | p1       | (A)10   | 10   | 120139 | 120148 |
| M2         | 27      | p1       | (A)10   | 10   | 122652 | 122661 |

|    |    |    |         |    |        |        |
|----|----|----|---------|----|--------|--------|
| M2 | 28 | p1 | (A)10   | 10 | 130982 | 130991 |
| M2 | 29 | p4 | (GAAA)3 | 12 | 133245 | 133256 |
| M2 | 30 | p1 | (A)10   | 10 | 133502 | 133511 |
| M2 | 31 | p1 | (A)10   | 10 | 136913 | 136922 |
| M2 | 32 | p4 | (TTTA)3 | 12 | 146935 | 146946 |
| M2 | 33 | p1 | (T)11   | 11 | 149649 | 149659 |
| M2 | 34 | p2 | (AT)6   | 12 | 150112 | 150123 |
| M2 | 35 | p1 | (A)11   | 11 | 151740 | 151750 |
| M2 | 36 | p2 | (AG)6   | 12 | 152046 | 152057 |
| M2 | 37 | p1 | (A)10   | 10 | 153466 | 153475 |
| M2 | 38 | p1 | (A)11   | 11 | 153848 | 153858 |
| M2 | 39 | p3 | (AGA)4  | 12 | 158209 | 158220 |
| M2 | 40 | p2 | (TC)5   | 10 | 159013 | 159022 |
| M2 | 41 | p1 | (A)10   | 10 | 161194 | 161203 |
| M2 | 42 | p4 | (TTCC)3 | 12 | 168532 | 168543 |
| M2 | 43 | p1 | (T)11   | 11 | 178567 | 178577 |
| M2 | 44 | p1 | (A)10   | 10 | 183307 | 183316 |
| M2 | 45 | p1 | (A)10   | 10 | 187111 | 187120 |
| M2 | 46 | p4 | (GAAT)3 | 12 | 190070 | 190081 |
| M2 | 47 | p4 | (AGAA)3 | 12 | 190089 | 190100 |
| M2 | 48 | p3 | (TCT)4  | 12 | 192270 | 192281 |

**Table S6. Tandem repeat sequences in the mitogenome of M1.**

| Indices        | Period | Copy   | Consensus | Percent | Percent | Score | A  | C  | G  | T  | Entropy |
|----------------|--------|--------|-----------|---------|---------|-------|----|----|----|----|---------|
|                | Size   | Number | Size      | Matches | Indels  |       |    |    |    |    | (0-2)   |
| 59874--59917   | 21     | 2      | 21        | 82      | 13      | 52    | 31 | 29 | 6  | 31 | 1.84    |
| 173619--173662 | 23     | 1.9    | 23        | 90      | 0       | 70    | 59 | 11 | 25 | 4  | 1.51    |
| 213145--213190 | 24     | 1.9    | 24        | 82      | 8       | 58    | 26 | 19 | 34 | 19 | 1.96    |
| 216813--216855 | 18     | 2.4    | 18        | 80      | 0       | 50    | 37 | 23 | 20 | 18 | 1.94    |

**Table S7. Tandem repeat sequences in the mitogenome of *M. elegans*.**

| Indices      | Period | Copy   | Consensus | Percent | Percent | Score | A  | C  | G  | T  | Entropy |
|--------------|--------|--------|-----------|---------|---------|-------|----|----|----|----|---------|
|              | Size   | Number | Size      | Matches | Indels  |       |    |    |    |    | (0-2)   |
| 11243--11288 | 24     | 1.9    | 24        | 82      | 8       | 58    | 26 | 19 | 34 | 19 | 1.96    |

14911--14953    18       2.4           18           80           0           50       37    23    20    18    1.94

---

**Table S8. Dispersed repeats sequences in M1.**

| The repeat length of<br>the first part | The starting site<br>of the first part | Matching<br>direction | The repeat length of<br>the second part | The starting site of<br>the second part | Interval distance<br>of repeats | E-value  |
|----------------------------------------|----------------------------------------|-----------------------|-----------------------------------------|-----------------------------------------|---------------------------------|----------|
| 148                                    | 186626                                 | F                     | 148                                     | 220497                                  | -2                              | 1.06E-74 |
| 115                                    | 2243                                   | F                     | 115                                     | 67720                                   | 0                               | 8.00E-60 |
| 109                                    | 29132                                  | P                     | 109                                     | 212144                                  | 0                               | 3.28E-56 |
| 116                                    | 102008                                 | F                     | 116                                     | 105076                                  | -2                              | 1.20E-55 |
| 110                                    | 50327                                  | P                     | 110                                     | 113541                                  | -1                              | 2.70E-54 |
| 105                                    | 80658                                  | F                     | 105                                     | 193388                                  | 0                               | 8.39E-54 |
| 104                                    | 70740                                  | F                     | 104                                     | 88711                                   | -2                              | 1.62E-48 |
| 89                                     | 86947                                  | F                     | 89                                      | 113907                                  | 0                               | 3.60E-44 |
| 87                                     | 70757                                  | F                     | 87                                      | 88728                                   | 0                               | 5.77E-43 |
| 84                                     | 114346                                 | P                     | 84                                      | 210110                                  | 0                               | 3.69E-41 |
| 82                                     | 37123                                  | F                     | 82                                      | 84246                                   | 0                               | 5.90E-40 |
| 81                                     | 75362                                  | P                     | 81                                      | 173638                                  | 0                               | 2.36E-39 |
| 77                                     | 80219                                  | P                     | 77                                      | 88268                                   | 0                               | 6.05E-37 |
| 66                                     | 113705                                 | P                     | 66                                      | 158893                                  | 0                               | 2.54E-30 |
| 76                                     | 72888                                  | P                     | 76                                      | 133707                                  | -3                              | 4.59E-30 |
| 62                                     | 70590                                  | F                     | 62                                      | 88564                                   | 0                               | 6.49E-28 |
| 62                                     | 133725                                 | P                     | 62                                      | 182140                                  | 0                               | 6.49E-28 |
| 65                                     | 29330                                  | F                     | 65                                      | 73408                                   | -1                              | 1.98E-27 |
| 64                                     | 29349                                  | F                     | 64                                      | 86998                                   | -1                              | 7.79E-27 |
| 63                                     | 130892                                 | P                     | 63                                      | 212078                                  | -1                              | 3.07E-26 |
| 58                                     | 86994                                  | P                     | 58                                      | 133729                                  | 0                               | 1.66E-25 |
| 58                                     | 86994                                  | F                     | 58                                      | 182140                                  | 0                               | 1.66E-25 |
| 59                                     | 29344                                  | F                     | 59                                      | 72883                                   | -1                              | 7.35E-24 |
| 59                                     | 29344                                  | P                     | 59                                      | 133729                                  | -1                              | 7.35E-24 |
| 54                                     | 29349                                  | F                     | 54                                      | 182144                                  | 0                               | 4.25E-23 |
| 54                                     | 130901                                 | P                     | 54                                      | 212078                                  | 0                               | 4.25E-23 |
| 52                                     | 29241                                  | P                     | 52                                      | 212084                                  | 0                               | 6.81E-22 |
| 55                                     | 47075                                  | P                     | 55                                      | 180075                                  | -1                              | 1.76E-21 |

|    |        |   |    |        |    |          |
|----|--------|---|----|--------|----|----------|
| 55 | 72888  | F | 55 | 182144 | -1 | 1.76E-21 |
| 51 | 72883  | F | 51 | 73422  | 0  | 2.72E-21 |
| 51 | 113002 | P | 51 | 218928 | 0  | 2.72E-21 |
| 54 | 72888  | F | 54 | 86998  | -1 | 6.89E-21 |
| 50 | 86993  | P | 50 | 97248  | 0  | 1.09E-20 |
| 53 | 73412  | F | 53 | 219963 | -1 | 2.71E-20 |
| 56 | 84282  | P | 56 | 113905 | -2 | 3.69E-20 |
| 49 | 97248  | F | 49 | 133738 | 0  | 4.36E-20 |
| 49 | 97248  | P | 49 | 182140 | 0  | 4.36E-20 |
| 49 | 183892 | P | 49 | 219975 | 0  | 4.36E-20 |
| 58 | 73423  | P | 58 | 97239  | -3 | 1.38E-19 |
| 58 | 130740 | P | 58 | 206218 | -3 | 1.38E-19 |
| 48 | 29245  | F | 48 | 130901 | 0  | 1.74E-19 |
| 51 | 67644  | F | 51 | 113026 | -1 | 4.17E-19 |
| 51 | 72904  | F | 51 | 75388  | -1 | 4.17E-19 |
| 51 | 72904  | P | 51 | 173642 | -1 | 4.17E-19 |
| 51 | 75388  | P | 51 | 133716 | -1 | 4.17E-19 |
| 51 | 133716 | F | 51 | 173642 | -1 | 4.17E-19 |
| 54 | 84282  | P | 54 | 86947  | -2 | 5.48E-19 |
| 53 | 29334  | F | 53 | 219963 | -2 | 2.11E-18 |
| 45 | 29349  | P | 45 | 97248  | 0  | 1.12E-17 |
| 45 | 84293  | P | 45 | 113905 | 0  | 1.12E-17 |
| 48 | 31229  | P | 48 | 99940  | -1 | 2.51E-17 |
| 51 | 73422  | P | 51 | 133737 | -2 | 3.12E-17 |
| 44 | 68184  | P | 44 | 80611  | 0  | 4.46E-17 |
| 47 | 102077 | F | 47 | 105145 | -1 | 9.83E-17 |
| 50 | 72914  | P | 50 | 133707 | -2 | 1.20E-16 |
| 43 | 84293  | P | 43 | 86947  | 0  | 1.78E-16 |
| 43 | 97255  | P | 43 | 113953 | 0  | 1.78E-16 |
| 46 | 73427  | F | 46 | 86998  | -1 | 3.85E-16 |
| 46 | 73427  | F | 46 | 182144 | -1 | 3.85E-16 |
| 46 | 186728 | F | 46 | 220599 | -1 | 3.85E-16 |
| 49 | 72884  | P | 49 | 97248  | -2 | 4.61E-16 |
| 42 | 107687 | F | 42 | 133713 | 0  | 7.14E-16 |
| 42 | 113954 | P | 42 | 133745 | 0  | 7.14E-16 |
| 42 | 113954 | F | 42 | 182140 | 0  | 7.14E-16 |
| 45 | 113954 | F | 45 | 219974 | -1 | 1.51E-15 |
| 41 | 72914  | F | 41 | 75398  | 0  | 2.86E-15 |
| 41 | 72914  | P | 41 | 173642 | 0  | 2.86E-15 |
| 50 | 80770  | F | 50 | 218905 | -3 | 5.76E-15 |
| 44 | 72916  | P | 44 | 107685 | -1 | 5.89E-15 |
| 44 | 113955 | P | 44 | 183897 | -1 | 5.89E-15 |

|    |        |   |    |        |    |          |
|----|--------|---|----|--------|----|----------|
| 40 | 119478 | P | 40 | 140672 | 0  | 1.14E-14 |
| 40 | 189565 | F | 40 | 212110 | 0  | 1.14E-14 |
| 43 | 72883  | F | 43 | 219973 | -1 | 2.30E-14 |
| 43 | 133745 | P | 43 | 219973 | -1 | 2.30E-14 |
| 46 | 37159  | P | 46 | 86955  | -2 | 2.60E-14 |
| 46 | 37159  | P | 46 | 113915 | -2 | 2.60E-14 |
| 39 | 75388  | F | 39 | 182160 | 0  | 4.57E-14 |
| 39 | 133728 | F | 39 | 173654 | 0  | 4.57E-14 |
| 39 | 173654 | P | 39 | 182160 | 0  | 4.57E-14 |
| 42 | 86994  | F | 42 | 219974 | -1 | 8.99E-14 |
| 42 | 97255  | P | 42 | 219974 | -1 | 8.99E-14 |
| 42 | 110986 | F | 42 | 138838 | -1 | 8.99E-14 |
| 42 | 182140 | F | 42 | 219974 | -1 | 8.99E-14 |
| 45 | 73494  | P | 45 | 97652  | -2 | 9.94E-14 |
| 38 | 29349  | F | 38 | 113958 | 0  | 1.83E-13 |
| 38 | 29365  | F | 38 | 75388  | 0  | 1.83E-13 |
| 38 | 29365  | P | 38 | 173655 | 0  | 1.83E-13 |
| 38 | 72888  | P | 38 | 183900 | 0  | 1.83E-13 |
| 38 | 73427  | P | 38 | 183900 | 0  | 1.83E-13 |
| 38 | 73427  | F | 38 | 219978 | 0  | 1.83E-13 |
| 38 | 75388  | F | 38 | 87014  | 0  | 1.83E-13 |
| 38 | 87014  | P | 38 | 173655 | 0  | 1.83E-13 |
| 41 | 86995  | P | 41 | 183900 | -1 | 3.51E-13 |
| 41 | 97255  | F | 41 | 183900 | -1 | 3.51E-13 |
| 41 | 133745 | F | 41 | 183900 | -1 | 3.51E-13 |
| 41 | 182141 | P | 41 | 183900 | -1 | 3.51E-13 |
| 44 | 73532  | P | 44 | 97161  | -2 | 3.80E-13 |
| 37 | 113475 | P | 37 | 212026 | 0  | 7.31E-13 |
| 40 | 90215  | P | 40 | 207259 | -1 | 1.37E-12 |
| 40 | 186596 | F | 40 | 220429 | -1 | 1.37E-12 |
| 39 | 75400  | P | 39 | 107690 | -1 | 5.35E-12 |
| 39 | 107690 | F | 39 | 173642 | -1 | 5.35E-12 |
| 42 | 32724  | F | 42 | 73299  | -2 | 5.53E-12 |
| 42 | 72884  | F | 42 | 113954 | -2 | 5.53E-12 |
| 42 | 73423  | F | 42 | 113954 | -2 | 5.53E-12 |
| 35 | 822    | P | 35 | 47996  | 0  | 1.17E-11 |
| 35 | 37170  | P | 35 | 86955  | 0  | 1.17E-11 |
| 35 | 37170  | P | 35 | 113915 | 0  | 1.17E-11 |
| 35 | 64131  | P | 35 | 220315 | 0  | 1.17E-11 |
| 38 | 6748   | F | 38 | 68041  | -1 | 2.08E-11 |
| 38 | 29349  | P | 38 | 183900 | -1 | 2.08E-11 |
| 38 | 29349  | F | 38 | 219978 | -1 | 2.08E-11 |



|    |        |   |    |        |    |          |
|----|--------|---|----|--------|----|----------|
| 38 | 29371  | P | 38 | 97191  | -1 | 2.08E-11 |
| 41 | 73504  | F | 41 | 146074 | -2 | 2.11E-11 |
| 34 | 71966  | F | 34 | 73542  | 0  | 4.68E-11 |
| 34 | 73508  | P | 34 | 107689 | 0  | 4.68E-11 |
| 34 | 73508  | P | 34 | 133715 | 0  | 4.68E-11 |
| 34 | 108841 | P | 34 | 108841 | 0  | 4.68E-11 |
| 43 | 72238  | P | 43 | 101968 | -3 | 5.95E-11 |
| 33 | 37133  | F | 33 | 183841 | 0  | 1.87E-10 |
| 33 | 84256  | F | 33 | 183841 | 0  | 1.87E-10 |
| 33 | 87020  | P | 33 | 97196  | 0  | 1.87E-10 |
| 33 | 108841 | R | 33 | 108841 | 0  | 1.87E-10 |
| 33 | 108841 | C | 33 | 108842 | 0  | 1.87E-10 |
| 33 | 108842 | R | 33 | 108842 | 0  | 1.87E-10 |
| 39 | 29294  | F | 39 | 113476 | -2 | 3.05E-10 |
| 36 | 106681 | F | 36 | 173619 | -1 | 3.16E-10 |
| 32 | 71907  | F | 32 | 73347  | 0  | 7.49E-10 |
| 32 | 75394  | P | 32 | 97197  | 0  | 7.49E-10 |
| 32 | 97197  | F | 32 | 133729 | 0  | 7.49E-10 |
| 32 | 97197  | F | 32 | 173655 | 0  | 7.49E-10 |
| 32 | 97197  | P | 32 | 182166 | 0  | 7.49E-10 |
| 32 | 108841 | P | 32 | 108841 | 0  | 7.49E-10 |
| 32 | 108841 | F | 32 | 108843 | 0  | 7.49E-10 |
| 32 | 108843 | P | 32 | 108843 | 0  | 7.49E-10 |
| 35 | 176802 | F | 35 | 178440 | -1 | 1.23E-09 |
| 31 | 47099  | P | 31 | 180075 | 0  | 2.99E-09 |
| 31 | 108841 | R | 31 | 108841 | 0  | 2.99E-09 |
| 31 | 108841 | C | 31 | 108844 | 0  | 2.99E-09 |
| 31 | 108844 | R | 31 | 108844 | 0  | 2.99E-09 |
| 34 | 72922  | F | 34 | 73508  | -1 | 4.77E-09 |
| 34 | 72922  | F | 34 | 146078 | -1 | 4.77E-09 |
| 34 | 114447 | P | 34 | 215106 | -1 | 4.77E-09 |
| 39 | 104466 | P | 39 | 116013 | -3 | 1.13E-08 |
| 30 | 74452  | P | 30 | 74452  | 0  | 1.2E-08  |
| 30 | 107699 | P | 30 | 182172 | 0  | 1.2E-08  |
| 30 | 108841 | P | 30 | 108841 | 0  | 1.2E-08  |
| 30 | 108841 | F | 30 | 108845 | 0  | 1.2E-08  |
| 30 | 108845 | P | 30 | 108845 | 0  | 1.2E-08  |
| 30 | 133758 | P | 30 | 219973 | 0  | 1.2E-08  |
| 36 | 29294  | P | 36 | 212026 | -2 | 1.66E-08 |
| 33 | 73508  | F | 33 | 75406  | -1 | 1.85E-08 |
| 33 | 73508  | P | 33 | 173642 | -1 | 1.85E-08 |
| 33 | 75406  | F | 33 | 146078 | -1 | 1.85E-08 |

|    |        |   |    |        |    |           |
|----|--------|---|----|--------|----|-----------|
| 33 | 146078 | P | 33 | 173642 | -1 | 1.85E-08  |
| 35 | 97652  | P | 35 | 146074 | -2 | 6.26E-08  |
| 35 | 109156 | F | 35 | 191103 | -2 | 6.26E-08  |
| 32 | 32655  | P | 32 | 157911 | -1 | 7.19E-08  |
| 32 | 70575  | P | 32 | 182666 | -1 | 7.19E-08  |
| 32 | 72910  | P | 32 | 97197  | -1 | 7.19E-08  |
| 32 | 72914  | F | 32 | 182170 | -1 | 7.19E-08  |
| 34 | 71966  | P | 34 | 97161  | -2 | 2.36E-07  |
| 34 | 107689 | P | 34 | 146078 | -2 | 2.36E-07  |
| 34 | 133715 | P | 34 | 146078 | -2 | 2.36E-07  |
| 31 | 1975   | F | 31 | 48002  | -1 | 2.78E-07  |
| 31 | 72922  | P | 31 | 97652  | -1 | 2.78E-07  |
| 31 | 75406  | P | 31 | 97652  | -1 | 2.78E-07  |
| 31 | 97652  | F | 31 | 173644 | -1 | 2.78E-07  |
| 31 | 130892 | P | 31 | 189565 | -1 | 2.78E-07  |
| 36 | 67635  | P | 36 | 218928 | -3 | 5.64E-07  |
| 33 | 77315  | F | 33 | 144573 | -2 | 8.89E-07  |
| 30 | 821    | P | 30 | 1975   | -1 | 1.08E-06  |
| 30 | 73443  | F | 30 | 75388  | -1 | 1.08E-06  |
| 30 | 73443  | P | 30 | 173663 | -1 | 1.08E-06  |
| 30 | 75387  | P | 30 | 97248  | -1 | 1.08E-06  |
| 30 | 97247  | F | 30 | 173663 | -1 | 1.08E-06  |
| 30 | 97268  | F | 30 | 183913 | -1 | 1.08E-06  |
| 30 | 97268  | P | 30 | 219973 | -1 | 1.08E-06  |
| 30 | 107702 | F | 30 | 173654 | -1 | 1.08E-06  |
| 30 | 107884 | P | 30 | 218282 | -1 | 1.08E-06  |
| 30 | 108840 | R | 30 | 108841 | -1 | 1.08E-06  |
| 30 | 108840 | C | 30 | 108845 | -1 | 1.08E-06  |
| 30 | 108845 | R | 30 | 108846 | -1 | 1.08E-06  |
| 30 | 182667 | P | 30 | 215366 | -1 | 1.08E-06  |
| 35 | 123712 | P | 35 | 149985 | -3 | 2.07E-06  |
| 35 | 177810 | F | 35 | 215385 | -3 | 2.07E-06  |
| 32 | 106674 | F | 32 | 107683 | -2 | 3.34E-06  |
| 34 | 3297   | F | 34 | 107714 | -3 | 7.56E-06  |
| 34 | 50499  | F | 34 | 218957 | -3 | 7.56E-06  |
| 31 | 97652  | F | 31 | 107692 | -2 | 0.0000125 |
| 31 | 97652  | F | 31 | 133718 | -2 | 0.0000125 |
| 31 | 122440 | F | 31 | 132550 | -2 | 0.0000125 |
| 31 | 189926 | F | 31 | 212037 | -2 | 0.0000125 |
| 33 | 31440  | F | 33 | 97780  | -3 | 0.0000276 |
| 33 | 109164 | F | 33 | 191111 | -3 | 0.0000276 |
| 33 | 115742 | P | 33 | 190039 | -3 | 0.0000276 |

|    |        |   |    |        |    |           |
|----|--------|---|----|--------|----|-----------|
| 30 | 7512   | P | 30 | 31592  | -2 | 0.0000469 |
| 30 | 17736  | F | 30 | 182971 | -2 | 0.0000469 |
| 30 | 29374  | P | 30 | 107702 | -2 | 0.0000469 |
| 30 | 29375  | F | 30 | 72914  | -2 | 0.0000469 |
| 30 | 70576  | F | 30 | 215366 | -2 | 0.0000469 |
| 30 | 72914  | F | 30 | 87024  | -2 | 0.0000469 |
| 30 | 87023  | P | 30 | 107702 | -2 | 0.0000469 |
| 30 | 89711  | F | 30 | 183840 | -2 | 0.0000469 |
| 30 | 97197  | F | 30 | 107703 | -2 | 0.0000469 |
| 30 | 108841 | F | 30 | 108847 | -2 | 0.0000469 |
| 30 | 133758 | F | 30 | 183913 | -2 | 0.0000469 |
| 32 | 8983   | P | 32 | 16263  | -3 | 0.0001    |
| 32 | 41590  | P | 32 | 121519 | -3 | 0.0001    |
| 32 | 60423  | F | 32 | 72016  | -3 | 0.0001    |
| 31 | 16510  | F | 31 | 50620  | -3 | 0.000363  |
| 31 | 107868 | P | 31 | 218297 | -3 | 0.000363  |
| 31 | 113475 | P | 31 | 189921 | -3 | 0.000363  |
| 31 | 186433 | P | 31 | 206151 | -3 | 0.000363  |
| 31 | 187849 | P | 31 | 209317 | -3 | 0.000363  |
| 30 | 27279  | P | 30 | 113016 | -3 | 0.00131   |
| 30 | 27279  | F | 30 | 218935 | -3 | 0.00131   |
| 30 | 29241  | P | 30 | 189561 | -3 | 0.00131   |
| 30 | 29530  | F | 30 | 70887  | -3 | 0.00131   |
| 30 | 37133  | F | 30 | 89712  | -3 | 0.00131   |
| 30 | 50597  | P | 30 | 67472  | -3 | 0.00131   |
| 30 | 70676  | F | 30 | 88640  | -3 | 0.00131   |
| 30 | 72930  | P | 30 | 106676 | -3 | 0.00131   |
| 30 | 73453  | P | 30 | 97237  | -3 | 0.00131   |
| 30 | 73502  | F | 30 | 182172 | -3 | 0.00131   |
| 30 | 84256  | F | 30 | 89712  | -3 | 0.00131   |
| 30 | 104476 | P | 30 | 116012 | -3 | 0.00131   |
| 30 | 106676 | F | 30 | 133711 | -3 | 0.00131   |
| 30 | 106691 | F | 30 | 173629 | -3 | 0.00131   |
| 30 | 108841 | C | 30 | 108848 | -3 | 0.00131   |
| 30 | 152149 | F | 30 | 180044 | -3 | 0.00131   |
| 30 | 160021 | F | 30 | 207404 | -3 | 0.00131   |

---

**Table S9. Dispersed repeats sequences in the mitogenome of M2.**

| The repeat length of<br>the first part | The starting site of<br>the first part | Matching<br>direction | The repeat length of<br>the second part | The starting site of<br>the second part | Interval distance<br>of repeats | E-value   |
|----------------------------------------|----------------------------------------|-----------------------|-----------------------------------------|-----------------------------------------|---------------------------------|-----------|
| 197                                    | 97881                                  | F                     | 197                                     | 129478                                  | -1                              | 1.56E-106 |
| 170                                    | 79003                                  | P                     | 170                                     | 97832                                   | -1                              | 2.43E-90  |
| 121                                    | 79003                                  | P                     | 121                                     | 129478                                  | -1                              | 5.48E-61  |
| 97                                     | 48318                                  | P                     | 97                                      | 144057                                  | -2                              | 1.78E-44  |
| 88                                     | 97590                                  | P                     | 88                                      | 111485                                  | 0                               | 1.11E-43  |
| 95                                     | 80302                                  | F                     | 95                                      | 112076                                  | -2                              | 2.73E-43  |
| 78                                     | 134251                                 | P                     | 78                                      | 149432                                  | 0                               | 1.17E-37  |
| 74                                     | 17014                                  | F                     | 74                                      | 149658                                  | 0                               | 2.99E-35  |
| 70                                     | 18061                                  | P                     | 70                                      | 57879                                   | 0                               | 7.66E-33  |
| 72                                     | 38154                                  | P                     | 72                                      | 106541                                  | -1                              | 1.03E-31  |
| 75                                     | 38161                                  | F                     | 75                                      | 57874                                   | -2                              | 1.87E-31  |
| 71                                     | 16944                                  | P                     | 71                                      | 44186                                   | -1                              | 4.08E-31  |
| 69                                     | 18061                                  | P                     | 69                                      | 38167                                   | -1                              | 6.34E-30  |
| 65                                     | 57874                                  | P                     | 65                                      | 106541                                  | -1                              | 1.53E-27  |
| 59                                     | 18071                                  | F                     | 59                                      | 106541                                  | 0                               | 3.21E-26  |
| 69                                     | 14043                                  | F                     | 69                                      | 84658                                   | -3                              | 4.33E-26  |
| 61                                     | 18073                                  | P                     | 61                                      | 142225                                  | -1                              | 3.67E-25  |
| 58                                     | 57879                                  | F                     | 58                                      | 142228                                  | -1                              | 2.23E-23  |
| 57                                     | 106543                                 | P                     | 57                                      | 142229                                  | -1                              | 8.79E-23  |
| 52                                     | 43983                                  | F                     | 52                                      | 104853                                  | 0                               | 5.26E-22  |
| 57                                     | 38167                                  | F                     | 57                                      | 142229                                  | -2                              | 7.38E-21  |
| 56                                     | 52754                                  | P                     | 56                                      | 140511                                  | -3                              | 1.54E-18  |
| 54                                     | 48447                                  | P                     | 54                                      | 143972                                  | -3                              | 2.2E-17   |
| 54                                     | 62355                                  | P                     | 54                                      | 122952                                  | -3                              | 2.2E-17   |
| 44                                     | 44041                                  | P                     | 44                                      | 85943                                   | 0                               | 3.45E-17  |
| 47                                     | 44006                                  | P                     | 47                                      | 183239                                  | -1                              | 7.6E-17   |
| 47                                     | 104875                                 | F                     | 47                                      | 159991                                  | -1                              | 7.6E-17   |
| 46                                     | 62456                                  | F                     | 46                                      | 142237                                  | -1                              | 2.97E-16  |
| 41                                     | 106574                                 | F                     | 41                                      | 172848                                  | 0                               | 2.21E-15  |
| 41                                     | 130651                                 | F                     | 41                                      | 142245                                  | 0                               | 2.21E-15  |
| 50                                     | 18072                                  | P                     | 50                                      | 62456                                   | -3                              | 4.45E-15  |
| 50                                     | 57888                                  | F                     | 50                                      | 62456                                   | -3                              | 4.45E-15  |
| 50                                     | 62456                                  | P                     | 50                                      | 106542                                  | -3                              | 4.45E-15  |
| 49                                     | 13870                                  | F                     | 49                                      | 84485                                   | -3                              | 1.67E-14  |
| 39                                     | 38154                                  | P                     | 39                                      | 172848                                  | 0                               | 3.53E-14  |
| 39                                     | 48283                                  | F                     | 39                                      | 177874                                  | 0                               | 3.53E-14  |

|    |        |   |    |        |    |          |
|----|--------|---|----|--------|----|----------|
| 42 | 18072  | P | 42 | 130651 | -1 | 6.95E-14 |
| 42 | 57896  | F | 42 | 130651 | -1 | 6.95E-14 |
| 42 | 106542 | P | 42 | 130651 | -1 | 6.95E-14 |
| 47 | 14518  | F | 47 | 85151  | -3 | 2.36E-13 |
| 44 | 43984  | F | 44 | 62442  | -2 | 2.94E-13 |
| 44 | 62442  | F | 44 | 104854 | -2 | 2.94E-13 |
| 46 | 38175  | F | 46 | 62456  | -3 | 8.83E-13 |
| 43 | 62464  | F | 43 | 130651 | -2 | 1.12E-12 |
| 43 | 62505  | P | 43 | 172820 | -2 | 1.12E-12 |
| 36 | 38200  | F | 36 | 57913  | 0  | 2.26E-12 |
| 42 | 38183  | F | 42 | 130651 | -2 | 4.27E-12 |
| 35 | 134329 | P | 35 | 149396 | 0  | 9.04E-12 |
| 38 | 113485 | F | 38 | 179323 | -1 | 1.61E-11 |
| 34 | 34512  | F | 34 | 192604 | 0  | 3.62E-11 |
| 34 | 44019  | P | 34 | 183239 | 0  | 3.62E-11 |
| 37 | 8267   | F | 37 | 89413  | -1 | 6.27E-11 |
| 33 | 44005  | F | 33 | 159991 | 0  | 1.45E-10 |
| 33 | 48508  | P | 33 | 143933 | 0  | 1.45E-10 |
| 39 | 62373  | P | 39 | 136935 | -2 | 2.35E-10 |
| 36 | 122952 | F | 36 | 136938 | -1 | 2.44E-10 |
| 32 | 18098  | P | 32 | 38167  | 0  | 5.78E-10 |
| 32 | 18102  | P | 32 | 142225 | 0  | 5.78E-10 |
| 32 | 19021  | F | 32 | 126949 | 0  | 5.78E-10 |
| 38 | 8689   | P | 38 | 90334  | -2 | 8.94E-10 |
| 35 | 18413  | P | 35 | 106467 | -1 | 9.49E-10 |
| 37 | 111590 | P | 37 | 128176 | -2 | 3.39E-09 |
| 37 | 160879 | R | 37 | 160879 | -2 | 3.39E-09 |
| 30 | 18092  | P | 30 | 43998  | 0  | 9.26E-09 |
| 30 | 18092  | P | 30 | 104868 | 0  | 9.26E-09 |
| 30 | 43998  | F | 30 | 57888  | 0  | 9.26E-09 |
| 30 | 43998  | P | 30 | 106562 | 0  | 9.26E-09 |
| 30 | 57888  | F | 30 | 104868 | 0  | 9.26E-09 |
| 30 | 104868 | P | 30 | 106562 | 0  | 9.26E-09 |
| 33 | 19278  | F | 33 | 71395  | -1 | 1.43E-08 |
| 38 | 51510  | F | 38 | 67105  | -3 | 3.22E-08 |
| 35 | 48466  | P | 35 | 143972 | -2 | 4.84E-08 |
| 32 | 57874  | P | 32 | 172848 | -1 | 5.55E-08 |
| 32 | 62475  | F | 32 | 130662 | -1 | 5.55E-08 |
| 32 | 159992 | P | 32 | 183254 | -1 | 5.55E-08 |
| 31 | 62381  | P | 31 | 136935 | -1 | 2.15E-07 |
| 36 | 106304 | F | 36 | 192913 | -3 | 4.36E-07 |
| 33 | 48386  | P | 33 | 144053 | -2 | 6.87E-07 |

|    |        |   |    |        |    |            |
|----|--------|---|----|--------|----|------------|
| 30 | 8862   | P | 30 | 125742 | -1 | 8.33E-07   |
| 30 | 38175  | F | 30 | 43998  | -1 | 8.33E-07   |
| 30 | 38175  | F | 30 | 104868 | -1 | 8.33E-07   |
| 30 | 43998  | F | 30 | 142237 | -1 | 8.33E-07   |
| 30 | 57909  | F | 30 | 130664 | -1 | 8.33E-07   |
| 30 | 57909  | F | 30 | 142258 | -1 | 8.33E-07   |
| 30 | 62475  | F | 30 | 142256 | -1 | 8.33E-07   |
| 30 | 104868 | F | 30 | 142237 | -1 | 8.33E-07   |
| 30 | 172821 | F | 30 | 177028 | -1 | 8.33E-07   |
| 35 | 37378  | F | 35 | 87520  | -3 | 0.0000016  |
| 35 | 53027  | F | 35 | 53066  | -3 | 0.0000016  |
| 32 | 104876 | P | 32 | 183254 | -2 | 0.00000258 |
| 31 | 57907  | F | 31 | 62475  | -2 | 0.00000968 |
| 31 | 62378  | P | 31 | 122952 | -2 | 0.00000968 |
| 31 | 62475  | P | 31 | 106542 | -2 | 0.00000968 |
| 31 | 82188  | P | 31 | 118017 | -2 | 0.00000968 |
| 31 | 106572 | P | 31 | 142226 | -2 | 0.00000968 |
| 31 | 130645 | P | 31 | 183261 | -2 | 0.00000968 |
| 33 | 22185  | P | 33 | 150505 | -3 | 0.0000213  |
| 33 | 169519 | P | 33 | 170034 | -3 | 0.0000213  |
| 30 | 38196  | F | 30 | 130664 | -2 | 0.0000362  |
| 30 | 38196  | F | 30 | 142258 | -2 | 0.0000362  |
| 30 | 75343  | F | 30 | 172131 | -2 | 0.0000362  |
| 30 | 82154  | P | 30 | 85969  | -2 | 0.0000362  |
| 30 | 142229 | P | 30 | 172844 | -2 | 0.0000362  |
| 30 | 160014 | P | 30 | 177023 | -2 | 0.0000362  |
| 32 | 17058  | P | 32 | 112053 | -3 | 0.0000775  |
| 31 | 18102  | F | 31 | 172846 | -3 | 0.000281   |
| 31 | 18393  | P | 31 | 106496 | -3 | 0.000281   |
| 31 | 38194  | F | 31 | 62475  | -3 | 0.000281   |
| 31 | 44031  | F | 31 | 130671 | -3 | 0.000281   |
| 31 | 82137  | P | 31 | 82184  | -3 | 0.000281   |
| 31 | 143102 | F | 31 | 169389 | -3 | 0.000281   |
| 30 | 44031  | F | 30 | 62484  | -3 | 0.00101    |
| 30 | 60767  | F | 30 | 157240 | -3 | 0.00101    |
| 30 | 62517  | P | 30 | 177028 | -3 | 0.00101    |
| 30 | 85997  | F | 30 | 106588 | -3 | 0.00101    |
| 30 | 85997  | F | 30 | 172862 | -3 | 0.00101    |
| 30 | 94043  | P | 30 | 127630 | -3 | 0.00101    |
| 30 | 104897 | P | 30 | 172817 | -3 | 0.00101    |
| 30 | 112056 | P | 30 | 149701 | -3 | 0.00101    |
| 30 | 134365 | P | 30 | 149376 | -3 | 0.00101    |

30

171834

P

30

179160

-3

0.00101

---

Table S10. The homologous DNA fragment in the *M. elegans* mitogenome.

| Num-<br>ber | Mitogenome  | %<br>Identity | Alignment<br>Length | Misma-<br>tches | Gap<br>Openings | Alignment start<br>(plastome) | Alignment end<br>(plastome) | Alignment start<br>(mitogenome) | Alignment end<br>(mitogenome) | E-value   | Bit<br>Score | MTPT annotation                            |
|-------------|-------------|---------------|---------------------|-----------------|-----------------|-------------------------------|-----------------------------|---------------------------------|-------------------------------|-----------|--------------|--------------------------------------------|
| 1           | Circular M1 | 95.768        | 2221                | 47              | 13              | 39504                         | 41705                       | 202592                          | 204784                        | 0         | 3537         | Partial ( <i>psaB,psaA</i> )               |
| 2           | Circular M2 | 95.768        | 2221                | 47              | 13              | 39504                         | 41705                       | 690                             | 2882                          | 0         | 3537         | Partial ( <i>psaB,psaA</i> )               |
| 3           | Circular M1 | 92.157        | 714                 | 17              | 5               | 38457                         | 39156                       | 201903                          | 202591                        | 0         | 972          | Partial ( <i>psaB</i> )                    |
| 4           | Circular M2 | 92.157        | 714                 | 17              | 5               | 38457                         | 39156                       | 1                               | 689                           | 0.00E+00  | 972          | Partial ( <i>psaB</i> )                    |
| 5           | Circular M1 | 81.494        | 616                 | 74              | 26              | 66621                         | 67215                       | 8267                            | 7671                          | 1.00E-131 | 470          | Complete ( <i>petG,trnW-CCA,trnP-UGG</i> ) |
| 6           | Circular M1 | 91.185        | 329                 | 20              | 2               | 153302                        | 153626                      | 93470                           | 93147                         | 2.83E-122 | 438          | Partial ( <i>rpl23,rpl2</i> )              |
| 7           | Circular M1 | 91.185        | 329                 | 20              | 2               | 86466                         | 86790                       | 93147                           | 93470                         | 2.83E-122 | 438          | Partial ( <i>rpl23,rpl2</i> )              |
| 8           | Circular M1 | 91.327        | 196                 | 7               | 4               | 154697                        | 154892                      | 39866                           | 39681                         | 2.36E-68  | 259          | Partial ( <i>rpl2</i> )                    |
| 9           | Circular M1 | 91.327        | 196                 | 7               | 4               | 85200                         | 85395                       | 39681                           | 39866                         | 2.36E-68  | 259          | Partial ( <i>rpl2</i> )                    |
| 10          | Circular M1 | 86.957        | 161                 | 8               | 3               | 153011                        | 153165                      | 93688                           | 93535                         | 4.10E-41  | 169          | Complete ( <i>trnM-CAU</i> )               |
| 11          | Circular M1 | 86.957        | 161                 | 8               | 3               | 86927                         | 87081                       | 93535                           | 93688                         | 4.10E-41  | 169          | Complete ( <i>trnM-CAU</i> )               |
| 12          | Circular M2 | 86.239        | 109                 | 9               | 1               | 35702                         | 35810                       | 94711                           | 94609                         | 1.71E-24  | 113          | Partial ( <i>psaC</i> )                    |
| 13          | Circular M2 | 97.619        | 84                  | 1               | 1               | 109298                        | 109380                      | 62419                           | 62336                         | 2.18E-33  | 143          | Complete ( <i>trnN-GUU</i> )               |
| 14          | Circular M2 | 97.619        | 84                  | 1               | 1               | 130712                        | 130794                      | 62336                           | 62419                         | 2.18E-33  | 143          | Complete ( <i>trnN-GUU</i> )               |
| 15          | Circular M1 | 96.386        | 83                  | 2               | 1               | 30680                         | 30762                       | 143955                          | 143874                        | 4.16E-31  | 135          | Complete ( <i>trnD-GUC</i> )               |
| 16          | Circular M1 | 92.208        | 77                  | 5               | 1               | 53809                         | 53884                       | 201653                          | 201729                        | 9.06E-23  | 108          | Complete ( <i>trnM-CAU</i> )               |
| 17          | Circular M1 | 97.368        | 76                  | 2               | 0               | 1                             | 76                          | 107175                          | 107100                        | 1.93E-29  | 130          | Complete ( <i>trnH-GUG</i> )               |
| 18          | Circular M2 | 97.015        | 67                  | 2               | 0               | 38390                         | 38456                       | 194715                          | 194781                        | 1.71E-24  | 113          | Partial ( <i>psaB</i> )                    |



**Table S11. The collection of long reads obtained from BLASTn results that can support different paths.**

| Paths     | Reference<br>length (bp) | Reads ID                            | Identity<br>(%) | Alignment<br>(bp) | Mis-<br>match | Gap | Query_<br>start | Query_<br>end | Reads_sta<br>rt | Reads_e<br>nd | E-value | Score |
|-----------|--------------------------|-------------------------------------|-----------------|-------------------|---------------|-----|-----------------|---------------|-----------------|---------------|---------|-------|
| 10_(28)_4 | 1238                     | m64196e_210606_053615/115607092/ccs | 100             | 1238              | 0             | 0   | 1               | 1238          | 4582            | 5819          | 0       | 2287  |
| 10_(28)_4 | 1238                     | m64196e_210606_053615/111740640/ccs | 100             | 1238              | 0             | 0   | 1               | 1238          | 9444            | 10681         | 0       | 2287  |
| 10_(28)_4 | 1238                     | m64196e_210606_053615/88607549/ccs  | 100             | 1238              | 0             | 0   | 1               | 1238          | 12527           | 11290         | 0       | 2287  |
| 10_(28)_4 | 1238                     | m64196e_210606_053615/80611414/ccs  | 100             | 1238              | 0             | 0   | 1               | 1238          | 6855            | 5618          | 0       | 2287  |
| 10_(28)_4 | 1238                     | m64196e_210606_053615/67045760/ccs  | 100             | 1238              | 0             | 0   | 1               | 1238          | 1799            | 3036          | 0       | 2287  |
| 10_(28)_4 | 1238                     | m64196e_210606_053615/55247931/ccs  | 100             | 1238              | 0             | 0   | 1               | 1238          | 3651            | 2414          | 0       | 2287  |
| 10_(28)_4 | 1238                     | m64196e_210606_053615/47319010/ccs  | 100             | 1238              | 0             | 0   | 1               | 1238          | 9574            | 10811         | 0       | 2287  |
| 10_(28)_4 | 1238                     | m64196e_210606_053615/43778700/ccs  | 100             | 1238              | 0             | 0   | 1               | 1238          | 6098            | 7335          | 0       | 2287  |
| 10_(28)_4 | 1238                     | m64198e_210604_164159/163906079/ccs | 100             | 1238              | 0             | 0   | 1               | 1238          | 3724            | 4961          | 0       | 2287  |
| 10_(28)_4 | 1238                     | m64198e_210604_164159/140771425/ccs | 100             | 1238              | 0             | 0   | 1               | 1238          | 8468            | 9705          | 0       | 2287  |
| 10_(28)_4 | 1238                     | m64198e_210604_164159/134152632/ccs | 100             | 1238              | 0             | 0   | 1               | 1238          | 6894            | 8131          | 0       | 2287  |
| 10_(28)_4 | 1238                     | m64198e_210604_164159/134021423/ccs | 100             | 1238              | 0             | 0   | 1               | 1238          | 13207           | 11970         | 0       | 2287  |
| 10_(28)_4 | 1238                     | m64198e_210604_164159/128191321/ccs | 100             | 1238              | 0             | 0   | 1               | 1238          | 3651            | 2414          | 0       | 2287  |
| 10_(28)_4 | 1238                     | m64198e_210604_164159/120849453/ccs | 100             | 1238              | 0             | 0   | 1               | 1238          | 12113           | 10876         | 0       | 2287  |
| 10_(28)_4 | 1238                     | m64198e_210604_164159/118686798/ccs | 100             | 1238              | 0             | 0   | 1               | 1238          | 10413           | 11650         | 0       | 2287  |
| 10_(28)_4 | 1238                     | m64198e_210604_164159/40110779/ccs  | 100             | 1238              | 0             | 0   | 1               | 1238          | 12180           | 13417         | 0       | 2287  |
| 10_(28)_4 | 1238                     | m64198e_210604_164159/30212381/ccs  | 100             | 1238              | 0             | 0   | 1               | 1238          | 13263           | 14500         | 0       | 2287  |
| 10_(28)_4 | 1238                     | m64196e_210606_053615/119603589/ccs | 99.919          | 1239              | 0             | 1   | 1               | 1238          | 11430           | 12668         | 0       | 2281  |
| 10_(28)_4 | 1238                     | m64196e_210606_053615/99484063/ccs  | 99.919          | 1239              | 0             | 1   | 1               | 1238          | 10672           | 11910         | 0       | 2281  |
| 10_(28)_4 | 1238                     | m64196e_210606_053615/94896895/ccs  | 99.919          | 1239              | 0             | 1   | 1               | 1238          | 8494            | 7256          | 0       | 2281  |
| 10_(28)_4 | 1238                     | m64196e_210606_053615/51184443/ccs  | 99.919          | 1239              | 0             | 1   | 1               | 1238          | 2754            | 1516          | 0       | 2281  |
| 10_(28)_4 | 1238                     | m64196e_210606_053615/123340094/ccs | 99.919          | 1238              | 0             | 1   | 1               | 1238          | 13289           | 12053         | 0       | 2279  |

|           |      |                                     |        |      |   |   |   |      |       |       |   |      |
|-----------|------|-------------------------------------|--------|------|---|---|---|------|-------|-------|---|------|
| 10_(28)_4 | 1238 | m64196e_210606_053615/83954403/ccs  | 99.919 | 1238 | 0 | 1 | 1 | 1238 | 931   | 2167  | 0 | 2279 |
| 10_(28)_4 | 1238 | m64196e_210606_053615/7211414/ccs   | 99.919 | 1238 | 0 | 1 | 1 | 1238 | 6703  | 5467  | 0 | 2279 |
| 10_(28)_4 | 1238 | m64198e_210604_164159/97386752/ccs  | 99.919 | 1238 | 0 | 1 | 1 | 1238 | 12217 | 10981 | 0 | 2279 |
| 10_(28)_4 | 1238 | m64196e_210606_053615/163449331/ccs | 99.839 | 1240 | 0 | 2 | 1 | 1238 | 1168  | 2407  | 0 | 2278 |
| 10_(28)_4 | 1238 | m64196e_210606_053615/153815572/ccs | 99.839 | 1240 | 0 | 2 | 1 | 1238 | 7500  | 8739  | 0 | 2278 |
| 10_(28)_4 | 1238 | m64196e_210606_053615/178521686/ccs | 99.839 | 1239 | 0 | 2 | 1 | 1238 | 4008  | 5245  | 0 | 2276 |
| 10_(28)_4 | 1238 | m64196e_210606_053615/120391747/ccs | 99.839 | 1239 | 0 | 2 | 1 | 1238 | 14303 | 15540 | 0 | 2276 |
| 10_(28)_4 | 1238 | m64196e_210606_053615/18483726/ccs  | 99.838 | 1238 | 0 | 2 | 1 | 1238 | 8604  | 7369  | 0 | 2274 |
| 10_(28)_4 | 1238 | m64198e_210604_164159/75893556/ccs  | 99.838 | 1238 | 0 | 2 | 1 | 1238 | 3652  | 4887  | 0 | 2274 |
| 10_(28)_4 | 1238 | m64198e_210604_164159/1050151/ccs   | 99.838 | 1238 | 0 | 2 | 1 | 1238 | 12237 | 11002 | 0 | 2274 |
| 10_(28)_4 | 1238 | m64198e_210604_164159/35390305/ccs  | 99.758 | 1241 | 0 | 3 | 1 | 1238 | 4324  | 3084  | 0 | 2272 |
| 10_(28)_4 | 1238 | m64198e_210604_164159/158859484/ccs | 99.758 | 1239 | 0 | 3 | 1 | 1238 | 14429 | 13193 | 0 | 2268 |
| 10_(28)_4 | 1238 | m64198e_210604_164159/174982549/ccs | 99.758 | 1238 | 0 | 3 | 1 | 1238 | 7406  | 6172  | 0 | 2266 |
| 10_(28)_4 | 1238 | m64198e_210604_164159/160891337/ccs | 99.678 | 1241 | 0 | 4 | 1 | 1238 | 6222  | 7461  | 0 | 2266 |
| 10_(28)_4 | 1238 | m64198e_210604_164159/56886168/ccs  | 99.758 | 1238 | 0 | 3 | 4 | 1238 | 13730 | 12493 | 0 | 2266 |
| 10_(28)_4 | 1238 | m64198e_210604_164159/55183005/ccs  | 99.678 | 1241 | 0 | 4 | 1 | 1238 | 15233 | 16472 | 0 | 2266 |
| 10_(28)_4 | 1238 | m64198e_210604_164159/21104117/ccs  | 99.678 | 1241 | 0 | 4 | 1 | 1238 | 8026  | 9265  | 0 | 2266 |
| 10_(28)_4 | 1238 | m64196e_210606_053615/145490090/ccs | 99.677 | 1238 | 4 | 0 | 1 | 1238 | 1764  | 527   | 0 | 2265 |
| 10_(28)_4 | 1238 | m64196e_210606_053615/48103573/ccs  | 99.677 | 1238 | 4 | 0 | 1 | 1238 | 2227  | 3464  | 0 | 2265 |
| 10_(28)_4 | 1238 | m64196e_210606_053615/45155487/ccs  | 99.677 | 1238 | 4 | 0 | 1 | 1238 | 12654 | 11417 | 0 | 2265 |
| 10_(28)_4 | 1238 | m64196e_210606_053615/40764755/ccs  | 99.677 | 1238 | 4 | 0 | 1 | 1238 | 7078  | 5841  | 0 | 2265 |
| 10_(28)_4 | 1238 | m64196e_210606_053615/3541532/ccs   | 99.677 | 1240 | 0 | 4 | 1 | 1238 | 12383 | 11146 | 0 | 2265 |
| 10_(28)_4 | 1238 | m64198e_210604_164159/169804790/ccs | 99.677 | 1238 | 4 | 0 | 1 | 1238 | 2755  | 3992  | 0 | 2265 |
| 10_(28)_4 | 1238 | m64198e_210604_164159/16122794/ccs  | 99.677 | 1238 | 4 | 0 | 1 | 1238 | 7666  | 8903  | 0 | 2265 |
| 10_(28)_4 | 1238 | m64198e_210604_164159/2032651/ccs   | 99.518 | 1244 | 0 | 6 | 1 | 1238 | 10495 | 9252  | 0 | 2259 |

|           |      |                                     |        |      |   |    |   |      |       |       |   |      |
|-----------|------|-------------------------------------|--------|------|---|----|---|------|-------|-------|---|------|
| 10_(28)_4 | 1238 | m64196e_210606_053615/149554662/ccs | 99.517 | 1241 | 2 | 4  | 1 | 1238 | 926   | 2165  | 0 | 2255 |
| 10_(28)_4 | 1238 | m64198e_210604_164159/7406630/ccs   | 99.517 | 1241 | 0 | 6  | 1 | 1238 | 7210  | 5973  | 0 | 2254 |
| 10_(28)_4 | 1238 | m64198e_210604_164159/18809994/ccs  | 99.436 | 1241 | 4 | 3  | 1 | 1238 | 4256  | 3016  | 0 | 2250 |
| 10_(28)_4 | 1238 | m64196e_210606_053615/175770066/ccs | 99.357 | 1244 | 0 | 8  | 1 | 1238 | 19203 | 17962 | 0 | 2246 |
| 10_(28)_4 | 1238 | m64196e_210606_053615/152830384/ccs | 99.355 | 1241 | 0 | 8  | 1 | 1238 | 12686 | 11451 | 0 | 2241 |
| 10_(28)_4 | 1238 | m64198e_210604_164159/34867271/ccs  | 99.195 | 1243 | 0 | 10 | 1 | 1238 | 1009  | 2246  | 0 | 2231 |
| 10_(28)_4 | 1238 | m64198e_210604_164159/77332750/ccs  | 99.034 | 1242 | 0 | 12 | 1 | 1238 | 4387  | 3154  | 0 | 2217 |
| 10_(28)_4 | 1238 | m64198e_210604_164159/130875525/ccs | 98.875 | 1244 | 2 | 12 | 1 | 1238 | 3500  | 4737  | 0 | 2209 |
| 10_(28)_4 | 1238 | m64198e_210604_164159/125306259/ccs | 99.417 | 1201 | 4 | 3  | 1 | 1199 | 1200  | 1     | 0 | 2176 |
| 8_(28)_11 | 1238 | m64196e_210606_053615/114360574/ccs | 100    | 1238 | 0 | 0  | 1 | 1238 | 10312 | 11549 | 0 | 2287 |
| 8_(28)_11 | 1238 | m64196e_210606_053615/111412666/ccs | 100    | 1238 | 0 | 0  | 1 | 1238 | 13332 | 12095 | 0 | 2287 |
| 8_(28)_11 | 1238 | m64196e_210606_053615/5245742/ccs   | 100    | 1238 | 0 | 0  | 1 | 1238 | 13162 | 14399 | 0 | 2287 |
| 8_(28)_11 | 1238 | m64198e_210604_164159/129172406/ccs | 100    | 1238 | 0 | 0  | 1 | 1238 | 11006 | 9769  | 0 | 2287 |
| 8_(28)_11 | 1238 | m64198e_210604_164159/121046361/ccs | 100    | 1238 | 0 | 0  | 1 | 1238 | 11067 | 12304 | 0 | 2287 |
| 8_(28)_11 | 1238 | m64198e_210604_164159/80938156/ccs  | 100    | 1238 | 0 | 0  | 1 | 1238 | 9802  | 11039 | 0 | 2287 |
| 8_(28)_11 | 1238 | m64198e_210604_164159/51314779/ccs  | 100    | 1238 | 0 | 0  | 1 | 1238 | 9720  | 10957 | 0 | 2287 |
| 8_(28)_11 | 1238 | m64198e_210604_164159/34210348/ccs  | 100    | 1238 | 0 | 0  | 1 | 1238 | 1691  | 454   | 0 | 2287 |
| 8_(28)_11 | 1238 | m64198e_210604_164159/19989763/ccs  | 100    | 1238 | 0 | 0  | 1 | 1238 | 9595  | 8358  | 0 | 2287 |
| 8_(28)_11 | 1238 | m64196e_210606_053615/176425804/ccs | 99.919 | 1239 | 0 | 1  | 1 | 1238 | 5325  | 4087  | 0 | 2281 |
| 8_(28)_11 | 1238 | m64196e_210606_053615/38537201/ccs  | 99.919 | 1239 | 0 | 1  | 1 | 1238 | 10782 | 9544  | 0 | 2281 |
| 8_(28)_11 | 1238 | m64198e_210604_164159/150931943/ccs | 99.919 | 1239 | 0 | 1  | 1 | 1238 | 8304  | 9542  | 0 | 2281 |
| 8_(28)_11 | 1238 | m64198e_210604_164159/130352974/ccs | 99.919 | 1239 | 0 | 1  | 1 | 1238 | 2972  | 1734  | 0 | 2281 |
| 8_(28)_11 | 1238 | m64196e_210606_053615/126681693/ccs | 99.919 | 1238 | 0 | 1  | 1 | 1238 | 9368  | 8132  | 0 | 2279 |
| 8_(28)_11 | 1238 | m64198e_210604_164159/60883666/ccs  | 99.919 | 1238 | 0 | 1  | 1 | 1238 | 12943 | 14179 | 0 | 2279 |
| 8_(28)_11 | 1238 | m64198e_210604_164159/146604342/ccs | 99.839 | 1240 | 0 | 2  | 1 | 1238 | 6915  | 5676  | 0 | 2278 |

|           |      |                                     |        |      |   |    |   |      |       |       |   |      |
|-----------|------|-------------------------------------|--------|------|---|----|---|------|-------|-------|---|------|
| 8_(28)_11 | 1238 | m64198e_210604_164159/49481506/ccs  | 99.839 | 1240 | 0 | 2  | 1 | 1238 | 1651  | 412   | 0 | 2278 |
| 8_(28)_11 | 1238 | m64198e_210604_164159/100141672/ccs | 99.839 | 1239 | 0 | 2  | 1 | 1238 | 15159 | 16396 | 0 | 2276 |
| 8_(28)_11 | 1238 | m64198e_210604_164159/90768547/ccs  | 99.839 | 1239 | 0 | 2  | 1 | 1238 | 10284 | 11521 | 0 | 2276 |
| 8_(28)_11 | 1238 | m64196e_210606_053615/155912632/ccs | 99.838 | 1238 | 0 | 2  | 1 | 1238 | 9214  | 7979  | 0 | 2274 |
| 8_(28)_11 | 1238 | m64196e_210606_053615/2032866/ccs   | 99.838 | 1238 | 0 | 2  | 1 | 1238 | 17226 | 15991 | 0 | 2274 |
| 8_(28)_11 | 1238 | m64198e_210604_164159/100338251/ccs | 99.758 | 1241 | 0 | 3  | 1 | 1238 | 1972  | 3212  | 0 | 2272 |
| 8_(28)_11 | 1238 | m64198e_210604_164159/42993204/ccs  | 99.758 | 1241 | 0 | 3  | 1 | 1238 | 10000 | 8760  | 0 | 2272 |
| 8_(28)_11 | 1238 | m64196e_210606_053615/140837300/ccs | 99.758 | 1240 | 0 | 3  | 1 | 1238 | 6324  | 7562  | 0 | 2270 |
| 8_(28)_11 | 1238 | m64196e_210606_053615/70910434/ccs  | 99.758 | 1239 | 0 | 3  | 1 | 1238 | 4080  | 2844  | 0 | 2268 |
| 8_(28)_11 | 1238 | m64196e_210606_053615/44173067/ccs  | 99.678 | 1242 | 0 | 4  | 1 | 1238 | 5080  | 6321  | 0 | 2268 |
| 8_(28)_11 | 1238 | m64196e_210606_053615/8390684/ccs   | 99.758 | 1239 | 0 | 3  | 1 | 1238 | 1404  | 168   | 0 | 2268 |
| 8_(28)_11 | 1238 | m64198e_210604_164159/14155787/ccs  | 99.758 | 1238 | 0 | 3  | 1 | 1238 | 13930 | 12696 | 0 | 2266 |
| 8_(28)_11 | 1238 | m64196e_210606_053615/148113465/ccs | 99.677 | 1240 | 0 | 4  | 1 | 1238 | 15829 | 17066 | 0 | 2265 |
| 8_(28)_11 | 1238 | m64198e_210604_164159/75827167/ccs  | 99.677 | 1239 | 0 | 4  | 1 | 1238 | 12550 | 11315 | 0 | 2263 |
| 8_(28)_11 | 1238 | m64198e_210604_164159/66782436/ccs  | 99.597 | 1241 | 0 | 5  | 1 | 1238 | 3422  | 2184  | 0 | 2259 |
| 8_(28)_11 | 1238 | m64196e_210606_053615/148898338/ccs | 99.597 | 1240 | 0 | 5  | 1 | 1238 | 3141  | 1905  | 0 | 2257 |
| 8_(28)_11 | 1238 | m64196e_210606_053615/135464205/ccs | 99.597 | 1240 | 0 | 5  | 1 | 1238 | 11943 | 13179 | 0 | 2257 |
| 8_(28)_11 | 1238 | m64196e_210606_053615/112526038/ccs | 99.597 | 1240 | 0 | 5  | 1 | 1238 | 2329  | 1093  | 0 | 2257 |
| 8_(28)_11 | 1238 | m64196e_210606_053615/60228947/ccs  | 99.356 | 1243 | 2 | 6  | 1 | 1238 | 1850  | 609   | 0 | 2246 |
| 8_(28)_11 | 1238 | m64196e_210606_053615/93653513/ccs  | 99.355 | 1240 | 0 | 8  | 1 | 1238 | 10150 | 8917  | 0 | 2239 |
| 8_(28)_11 | 1238 | m64198e_210604_164159/42074419/ccs  | 99.275 | 1242 | 3 | 6  | 1 | 1238 | 2801  | 1562  | 0 | 2239 |
| 8_(28)_11 | 1238 | m64198e_210604_164159/114362750/ccs | 99.276 | 1243 | 0 | 9  | 1 | 1238 | 8879  | 7641  | 0 | 2237 |
| 8_(28)_11 | 1238 | m64198e_210604_164159/50266896/ccs  | 99.197 | 1245 | 2 | 8  | 1 | 1238 | 8871  | 7628  | 0 | 2237 |
| 8_(28)_11 | 1238 | m64196e_210606_053615/174653453/ccs | 99.197 | 1245 | 0 | 10 | 1 | 1238 | 2897  | 1656  | 0 | 2235 |
| 8_(28)_11 | 1238 | m64196e_210606_053615/76874045/ccs  | 99.036 | 1245 | 0 | 11 | 1 | 1238 | 2195  | 3434  | 0 | 2222 |

|            |      |                                     |        |      |    |    |    |      |       |       |   |      |
|------------|------|-------------------------------------|--------|------|----|----|----|------|-------|-------|---|------|
| 8_(28)_11  | 1238 | m64196e_210606_053615/121569345/ccs | 98.799 | 1249 | 2  | 13 | 1  | 1238 | 7038  | 8284  | 0 | 2211 |
| 8_(28)_11  | 1238 | m64196e_210606_053615/120785700/ccs | 98.789 | 1239 | 14 | 1  | 1  | 1238 | 4212  | 2974  | 0 | 2204 |
| 8_(28)_11  | 1238 | m64198e_210604_164159/84347691/ccs  | 98.789 | 1239 | 14 | 1  | 1  | 1238 | 4026  | 2788  | 0 | 2204 |
| 8_(28)_11  | 1238 | m64198e_210604_164159/1114220/ccs   | 98.796 | 1246 | 0  | 15 | 1  | 1238 | 572   | 1810  | 0 | 2204 |
| 8_(28)_11  | 1238 | m64196e_210606_053615/139003203/ccs | 99.505 | 1211 | 0  | 6  | 29 | 1238 | 16992 | 15787 | 0 | 2198 |
| 8_(28)_11  | 1238 | m64196e_210606_053615/54591560/ccs  | 98.639 | 1249 | 2  | 14 | 1  | 1238 | 2606  | 1362  | 0 | 2198 |
| 8_(28)_11  | 1238 | m64196e_210606_053615/77859427/ccs  | 98.708 | 1238 | 14 | 2  | 1  | 1238 | 5145  | 3910  | 0 | 2196 |
| 8_(28)_11  | 1238 | m64196e_210606_053615/80284510/ccs  | 98.551 | 1242 | 14 | 4  | 1  | 1238 | 7043  | 5802  | 0 | 2191 |
| 8_(28)_11  | 1238 | m64196e_210606_053615/155257240/ccs | 98.548 | 1240 | 14 | 4  | 1  | 1238 | 16025 | 14788 | 0 | 2187 |
| 8_(28)_11  | 1238 | m64198e_210604_164159/147980954/ccs | 98.547 | 1239 | 15 | 3  | 1  | 1238 | 10013 | 11249 | 0 | 2185 |
| 8_(28)_11  | 1238 | m64198e_210604_164159/8651118/ccs   | 98.47  | 1242 | 14 | 5  | 1  | 1238 | 1573  | 333   | 0 | 2183 |
| 8_(28)_11  | 1238 | m64198e_210604_164159/167642272/ccs | 97.99  | 1244 | 16 | 9  | 1  | 1238 | 16983 | 15743 | 0 | 2150 |
| 8_(28)_11  | 1238 | m64196e_210606_053615/47513737/ccs  | 97.271 | 1246 | 17 | 17 | 1  | 1238 | 1340  | 104   | 0 | 2097 |
| 10_(28)_11 | 1238 | m64198e_210604_164159/147720583/ccs | 99.758 | 1241 | 0  | 3  | 1  | 1238 | 11811 | 10571 | 0 | 2272 |
| 48_(44)_11 | 1139 | m64196e_210606_053615/117114124/ccs | 100    | 1139 | 0  | 0  | 1  | 1139 | 9966  | 8828  | 0 | 2104 |
| 48_(44)_11 | 1139 | m64196e_210606_053615/67568997/ccs  | 100    | 1139 | 0  | 0  | 1  | 1139 | 9071  | 10209 | 0 | 2104 |
| 48_(44)_11 | 1139 | m64196e_210606_053615/66127953/ccs  | 100    | 1139 | 0  | 0  | 1  | 1139 | 7596  | 8734  | 0 | 2104 |
| 48_(44)_11 | 1139 | m64196e_210606_053615/25755652/ccs  | 100    | 1139 | 0  | 0  | 1  | 1139 | 10296 | 9158  | 0 | 2104 |
| 48_(44)_11 | 1139 | m64196e_210606_053615/6425095/ccs   | 100    | 1139 | 0  | 0  | 1  | 1139 | 11085 | 12223 | 0 | 2104 |
| 48_(44)_11 | 1139 | m64198e_210604_164159/163315883/ccs | 100    | 1139 | 0  | 0  | 1  | 1139 | 10420 | 9282  | 0 | 2104 |
| 48_(44)_11 | 1139 | m64198e_210604_164159/130025879/ccs | 100    | 1139 | 0  | 0  | 1  | 1139 | 1979  | 841   | 0 | 2104 |
| 48_(44)_11 | 1139 | m64198e_210604_164159/31981641/ccs  | 100    | 1139 | 0  | 0  | 1  | 1139 | 11018 | 12156 | 0 | 2104 |
| 48_(44)_11 | 1139 | m64198e_210604_164159/984146/ccs    | 100    | 1139 | 0  | 0  | 1  | 1139 | 6486  | 7624  | 0 | 2104 |
| 48_(44)_11 | 1139 | m64196e_210606_053615/115018540/ccs | 99.912 | 1140 | 0  | 1  | 1  | 1139 | 11269 | 12408 | 0 | 2098 |
| 48_(44)_11 | 1139 | m64196e_210606_053615/73007997/ccs  | 99.912 | 1140 | 0  | 1  | 1  | 1139 | 2542  | 1403  | 0 | 2098 |

|            |      |                                     |        |      |   |   |   |      |       |       |   |      |
|------------|------|-------------------------------------|--------|------|---|---|---|------|-------|-------|---|------|
| 48_(44)_11 | 1139 | m64196e_210606_053615/21563064/ccs  | 99.912 | 1139 | 1 | 0 | 1 | 1139 | 3026  | 4164  | 0 | 2098 |
| 48_(44)_11 | 1139 | m64198e_210604_164159/172754514/ccs | 99.912 | 1140 | 0 | 1 | 1 | 1139 | 8743  | 9882  | 0 | 2098 |
| 48_(44)_11 | 1139 | m64198e_210604_164159/136840791/ccs | 99.912 | 1140 | 0 | 1 | 1 | 1139 | 10224 | 9085  | 0 | 2098 |
| 48_(44)_11 | 1139 | m64198e_210604_164159/13043557/ccs  | 99.912 | 1140 | 0 | 1 | 1 | 1139 | 7661  | 6522  | 0 | 2098 |
| 48_(44)_11 | 1139 | m64196e_210606_053615/143197999/ccs | 99.912 | 1139 | 0 | 1 | 1 | 1139 | 7652  | 6515  | 0 | 2097 |
| 48_(44)_11 | 1139 | m64198e_210604_164159/134023375/ccs | 99.912 | 1139 | 0 | 1 | 1 | 1139 | 9833  | 8696  | 0 | 2097 |
| 48_(44)_11 | 1139 | m64196e_210606_053615/87688399/ccs  | 99.825 | 1141 | 0 | 2 | 1 | 1139 | 6185  | 7325  | 0 | 2095 |
| 48_(44)_11 | 1139 | m64198e_210604_164159/37488937/ccs  | 99.825 | 1141 | 0 | 2 | 1 | 1139 | 12447 | 11307 | 0 | 2095 |
| 48_(44)_11 | 1139 | m64198e_210604_164159/133038789/ccs | 99.825 | 1140 | 0 | 2 | 1 | 1139 | 13127 | 11989 | 0 | 2093 |
| 48_(44)_11 | 1139 | m64196e_210606_053615/62194227/ccs  | 99.824 | 1139 | 0 | 2 | 1 | 1139 | 12761 | 13897 | 0 | 2091 |
| 48_(44)_11 | 1139 | m64198e_210604_164159/41287975/ccs  | 99.824 | 1139 | 0 | 2 | 1 | 1139 | 5482  | 4346  | 0 | 2091 |
| 48_(44)_11 | 1139 | m64196e_210606_053615/173606627/ccs | 99.737 | 1142 | 0 | 3 | 1 | 1139 | 6715  | 7856  | 0 | 2089 |
| 48_(44)_11 | 1139 | m64196e_210606_053615/61868157/ccs  | 99.737 | 1142 | 0 | 3 | 1 | 1139 | 11430 | 12571 | 0 | 2089 |
| 48_(44)_11 | 1139 | m64196e_210606_053615/2032866/ccs   | 99.737 | 1141 | 0 | 3 | 1 | 1139 | 1825  | 2964  | 0 | 2087 |
| 48_(44)_11 | 1139 | m64196e_210606_053615/109512519/ccs | 99.737 | 1140 | 0 | 3 | 1 | 1139 | 14089 | 12952 | 0 | 2085 |
| 48_(44)_11 | 1139 | m64198e_210604_164159/6029350/ccs   | 99.737 | 1140 | 0 | 3 | 1 | 1139 | 11894 | 10757 | 0 | 2085 |
| 48_(44)_11 | 1139 | m64196e_210606_053615/111151897/ccs | 99.649 | 1141 | 0 | 4 | 1 | 1139 | 2994  | 4132  | 0 | 2082 |
| 48_(44)_11 | 1139 | m64198e_210604_164159/29818887/ccs  | 99.649 | 1141 | 1 | 3 | 1 | 1139 | 11959 | 13098 | 0 | 2082 |
| 48_(44)_11 | 1139 | m64196e_210606_053615/85525462/ccs  | 99.389 | 1145 | 0 | 7 | 1 | 1139 | 5593  | 4450  | 0 | 2069 |
| 48_(44)_11 | 1139 | m64198e_210604_164159/175571692/ccs | 99.474 | 1140 | 0 | 6 | 1 | 1139 | 3993  | 2859  | 0 | 2067 |
| 48_(44)_11 | 1139 | m64198e_210604_164159/176685980/ccs | 99.387 | 1142 | 0 | 7 | 1 | 1139 | 10271 | 11408 | 0 | 2063 |
| 48_(44)_11 | 1139 | m64198e_210604_164159/150930501/ccs | 99.387 | 1142 | 0 | 7 | 1 | 1139 | 9116  | 10253 | 0 | 2063 |
| 48_(44)_11 | 1139 | m64198e_210604_164159/100338251/ccs | 99.213 | 1144 | 1 | 8 | 1 | 1139 | 17388 | 16248 | 0 | 2056 |
| 48_(44)_11 | 1139 | m64196e_210606_053615/157024504/ccs | 99.126 | 1144 | 1 | 9 | 1 | 1139 | 13439 | 14578 | 0 | 2049 |
| 48_(44)_11 | 1139 | m64196e_210606_053615/32638013/ccs  | 99.211 | 1141 | 0 | 9 | 1 | 1139 | 1519  | 386   | 0 | 2049 |

|            |      |                                     |        |      |   |    |   |      |       |       |   |      |
|------------|------|-------------------------------------|--------|------|---|----|---|------|-------|-------|---|------|
| 48_(44)_11 | 1139 | m64198e_210604_164159/106628567/ccs | 99.125 | 1143 | 1 | 9  | 2 | 1139 | 225   | 1363  | 0 | 2047 |
| 48_(44)_11 | 1139 | m64196e_210606_053615/139003203/ccs | 98.862 | 1142 | 0 | 13 | 1 | 1139 | 1678  | 2809  | 0 | 2025 |
| 48_(44)_11 | 1139 | m64198e_210604_164159/48826536/ccs  | 98.777 | 1145 | 1 | 12 | 1 | 1139 | 14412 | 15549 | 0 | 2025 |
| 8_(44)_2   | 1139 | m64196e_210606_053615/138675925/ccs | 100    | 1139 | 0 | 0  | 1 | 1139 | 2895  | 1757  | 0 | 2104 |
| 8_(44)_2   | 1139 | m64196e_210606_053615/122030543/ccs | 100    | 1139 | 0 | 0  | 1 | 1139 | 10163 | 11301 | 0 | 2104 |
| 8_(44)_2   | 1139 | m64196e_210606_053615/55642932/ccs  | 100    | 1139 | 0 | 0  | 1 | 1139 | 3923  | 5061  | 0 | 2104 |
| 8_(44)_2   | 1139 | m64196e_210606_053615/34537532/ccs  | 100    | 1139 | 0 | 0  | 1 | 1139 | 8151  | 9289  | 0 | 2104 |
| 8_(44)_2   | 1139 | m64198e_210604_164159/136774654/ccs | 100    | 1139 | 0 | 0  | 1 | 1139 | 3361  | 4499  | 0 | 2104 |
| 8_(44)_2   | 1139 | m64198e_210604_164159/130877113/ccs | 100    | 1139 | 0 | 0  | 1 | 1139 | 6576  | 5438  | 0 | 2104 |
| 8_(44)_2   | 1139 | m64198e_210604_164159/116394147/ccs | 100    | 1139 | 0 | 0  | 1 | 1139 | 7798  | 6660  | 0 | 2104 |
| 8_(44)_2   | 1139 | m64198e_210604_164159/48955926/ccs  | 100    | 1139 | 0 | 0  | 1 | 1139 | 4553  | 5691  | 0 | 2104 |
| 8_(44)_2   | 1139 | m64198e_210604_164159/28510449/ccs  | 100    | 1139 | 0 | 0  | 1 | 1139 | 10304 | 11442 | 0 | 2104 |
| 8_(44)_2   | 1139 | m64198e_210604_164159/22020505/ccs  | 100    | 1139 | 0 | 0  | 1 | 1139 | 9720  | 8582  | 0 | 2104 |
| 8_(44)_2   | 1139 | m64198e_210604_164159/3473773/ccs   | 100    | 1139 | 0 | 0  | 1 | 1139 | 13939 | 15077 | 0 | 2104 |
| 8_(44)_2   | 1139 | m64196e_210606_053615/104597940/ccs | 99.912 | 1140 | 0 | 1  | 1 | 1139 | 14373 | 15512 | 0 | 2098 |
| 8_(44)_2   | 1139 | m64198e_210604_164159/176292411/ccs | 99.912 | 1140 | 0 | 1  | 1 | 1139 | 7078  | 5939  | 0 | 2098 |
| 8_(44)_2   | 1139 | m64196e_210606_053615/110691045/ccs | 99.912 | 1139 | 0 | 1  | 1 | 1139 | 9432  | 8295  | 0 | 2097 |
| 8_(44)_2   | 1139 | m64196e_210606_053615/1837441/ccs   | 99.912 | 1139 | 0 | 1  | 1 | 1139 | 546   | 1683  | 0 | 2097 |
| 8_(44)_2   | 1139 | m64198e_210604_164159/135202299/ccs | 99.912 | 1139 | 0 | 1  | 1 | 1139 | 7854  | 6717  | 0 | 2097 |
| 8_(44)_2   | 1139 | m64198e_210604_164159/134941315/ccs | 99.912 | 1139 | 0 | 1  | 1 | 1139 | 6961  | 5824  | 0 | 2097 |
| 8_(44)_2   | 1139 | m64198e_210604_164159/108724420/ccs | 99.912 | 1139 | 0 | 1  | 1 | 1139 | 15705 | 14568 | 0 | 2097 |
| 8_(44)_2   | 1139 | m64198e_210604_164159/49613596/ccs  | 99.912 | 1139 | 0 | 1  | 1 | 1139 | 2537  | 3674  | 0 | 2097 |
| 8_(44)_2   | 1139 | m64196e_210606_053615/143656352/ccs | 99.825 | 1141 | 0 | 1  | 1 | 1139 | 13693 | 12553 | 0 | 2095 |
| 8_(44)_2   | 1139 | m64196e_210606_053615/177932209/ccs | 99.825 | 1140 | 0 | 2  | 1 | 1139 | 5389  | 6527  | 0 | 2093 |
| 8_(44)_2   | 1139 | m64196e_210606_053615/37817057/ccs  | 99.825 | 1140 | 0 | 2  | 1 | 1139 | 5271  | 4133  | 0 | 2093 |

|           |      |                                     |        |      |   |    |   |      |       |       |   |      |
|-----------|------|-------------------------------------|--------|------|---|----|---|------|-------|-------|---|------|
| 8_(44)_2  | 1139 | m64198e_210604_164159/92670393/ccs  | 99.825 | 1140 | 0 | 2  | 1 | 1139 | 4275  | 5413  | 0 | 2093 |
| 8_(44)_2  | 1139 | m64198e_210604_164159/21955917/ccs  | 99.825 | 1140 | 0 | 2  | 1 | 1139 | 917   | 2055  | 0 | 2093 |
| 8_(44)_2  | 1139 | m64196e_210606_053615/150405860/ccs | 99.824 | 1139 | 0 | 2  | 1 | 1139 | 2633  | 3769  | 0 | 2091 |
| 8_(44)_2  | 1139 | m64196e_210606_053615/95619295/ccs  | 99.824 | 1139 | 0 | 2  | 1 | 1139 | 11794 | 12930 | 0 | 2091 |
| 8_(44)_2  | 1139 | m64198e_210604_164159/136577954/ccs | 99.737 | 1142 | 0 | 3  | 1 | 1139 | 3251  | 2110  | 0 | 2089 |
| 8_(44)_2  | 1139 | m64198e_210604_164159/126093115/ccs | 99.737 | 1140 | 0 | 3  | 1 | 1139 | 12376 | 13513 | 0 | 2085 |
| 8_(44)_2  | 1139 | m64198e_210604_164159/6097730/ccs   | 99.65  | 1143 | 0 | 4  | 1 | 1139 | 1492  | 2634  | 0 | 2085 |
| 8_(44)_2  | 1139 | m64196e_210606_053615/91031054/ccs  | 99.65  | 1142 | 0 | 4  | 1 | 1139 | 4976  | 3836  | 0 | 2084 |
| 8_(44)_2  | 1139 | m64196e_210606_053615/46334337/ccs  | 99.649 | 1139 | 0 | 4  | 1 | 1139 | 5177  | 6311  | 0 | 2078 |
| 8_(44)_2  | 1139 | m64196e_210606_053615/84281204/ccs  | 99.476 | 1145 | 0 | 6  | 1 | 1139 | 13216 | 14360 | 0 | 2076 |
| 8_(44)_2  | 1139 | m64196e_210606_053615/10880136/ccs  | 99.389 | 1145 | 0 | 7  | 1 | 1139 | 994   | 2137  | 0 | 2069 |
| 8_(44)_2  | 1139 | m64198e_210604_164159/29952601/ccs  | 99.474 | 1141 | 0 | 6  | 1 | 1139 | 12241 | 13377 | 0 | 2069 |
| 8_(44)_2  | 1139 | m64196e_210606_053615/155254835/ccs | 99.388 | 1143 | 0 | 7  | 1 | 1139 | 9109  | 10248 | 0 | 2065 |
| 8_(44)_2  | 1139 | m64196e_210606_053615/171181345/ccs | 99.299 | 1141 | 2 | 6  | 1 | 1139 | 4967  | 6103  | 0 | 2058 |
| 8_(44)_2  | 1139 | m64198e_210604_164159/52299750/ccs  | 99.213 | 1143 | 0 | 9  | 1 | 1139 | 206   | 1343  | 0 | 2052 |
| 8_(44)_2  | 1139 | m64196e_210606_053615/3015505/ccs   | 99.127 | 1145 | 1 | 9  | 1 | 1139 | 9344  | 10485 | 0 | 2050 |
| 8_(44)_2  | 1139 | m64198e_210604_164159/128715562/ccs | 98.607 | 1149 | 4 | 12 | 1 | 1139 | 4443  | 5589  | 0 | 2023 |
| 8_(44)_2  | 1139 | m64198e_210604_164159/82117642/ccs  | 98.527 | 1154 | 2 | 15 | 1 | 1139 | 7087  | 5934  | 0 | 2023 |
| 48_(44)_2 | 1139 | m64196e_210606_053615/63965609/ccs  | 99.825 | 1140 | 0 | 2  | 1 | 1139 | 9916  | 8778  | 0 | 2093 |
| 5_(45)_13 | 1135 | m64198e_210604_164159/124387416/ccs | 100    | 1135 | 0 | 0  | 1 | 1135 | 6829  | 7963  | 0 | 2097 |
| 5_(45)_13 | 1135 | m64198e_210604_164159/120195320/ccs | 100    | 1135 | 0 | 0  | 1 | 1135 | 6923  | 5789  | 0 | 2097 |
| 5_(45)_13 | 1135 | m64198e_210604_164159/108136392/ccs | 100    | 1135 | 0 | 0  | 1 | 1135 | 6202  | 7336  | 0 | 2097 |
| 5_(45)_13 | 1135 | m64198e_210604_164159/92144897/ccs  | 100    | 1135 | 0 | 0  | 1 | 1135 | 1234  | 100   | 0 | 2097 |
| 5_(45)_13 | 1135 | m64198e_210604_164159/20449316/ccs  | 100    | 1135 | 0 | 0  | 1 | 1135 | 6723  | 7857  | 0 | 2097 |
| 5_(45)_13 | 1135 | m64198e_210604_164159/108920994/ccs | 99.912 | 1136 | 0 | 1  | 1 | 1135 | 5251  | 4116  | 0 | 2091 |



|           |      |                                     |        |      |   |    |   |      |       |       |   |      |
|-----------|------|-------------------------------------|--------|------|---|----|---|------|-------|-------|---|------|
| 5_(45)_13 | 1135 | m64196e_210606_053615/139987330/ccs | 99.912 | 1135 | 0 | 1  | 1 | 1135 | 9165  | 8032  | 0 | 2089 |
| 5_(45)_13 | 1135 | m64196e_210606_053615/111216493/ccs | 99.912 | 1135 | 0 | 1  | 1 | 1135 | 1997  | 3130  | 0 | 2089 |
| 5_(45)_13 | 1135 | m64196e_210606_053615/77925144/ccs  | 99.912 | 1135 | 0 | 1  | 1 | 1135 | 2547  | 3680  | 0 | 2089 |
| 5_(45)_13 | 1135 | m64198e_210604_164159/111083966/ccs | 99.912 | 1135 | 0 | 1  | 1 | 1135 | 4628  | 5761  | 0 | 2089 |
| 5_(45)_13 | 1135 | m64198e_210604_164159/66848592/ccs  | 99.912 | 1135 | 0 | 1  | 1 | 1135 | 1193  | 60    | 0 | 2089 |
| 5_(45)_13 | 1135 | m64196e_210606_053615/118686645/ccs | 99.824 | 1137 | 0 | 2  | 1 | 1135 | 2099  | 3235  | 0 | 2087 |
| 5_(45)_13 | 1135 | m64196e_210606_053615/68814786/ccs  | 99.824 | 1137 | 0 | 2  | 1 | 1135 | 11730 | 12866 | 0 | 2087 |
| 5_(45)_13 | 1135 | m64196e_210606_053615/33949089/ccs  | 99.824 | 1137 | 0 | 2  | 1 | 1135 | 13599 | 12463 | 0 | 2087 |
| 5_(45)_13 | 1135 | m64198e_210604_164159/62457697/ccs  | 99.824 | 1137 | 0 | 2  | 1 | 1135 | 5471  | 4335  | 0 | 2087 |
| 5_(45)_13 | 1135 | m64196e_210606_053615/168298694/ccs | 99.824 | 1136 | 0 | 2  | 1 | 1135 | 7402  | 6268  | 0 | 2085 |
| 5_(45)_13 | 1135 | m64198e_210604_164159/112986436/ccs | 99.824 | 1136 | 0 | 2  | 1 | 1135 | 725   | 1859  | 0 | 2085 |
| 5_(45)_13 | 1135 | m64196e_210606_053615/25691686/ccs  | 99.736 | 1137 | 1 | 2  | 1 | 1135 | 11101 | 9965  | 0 | 2082 |
| 5_(45)_13 | 1135 | m64198e_210604_164159/113904392/ccs | 99.649 | 1139 | 0 | 2  | 1 | 1135 | 8920  | 10058 | 0 | 2078 |
| 5_(45)_13 | 1135 | m64196e_210606_053615/5900086/ccs   | 99.648 | 1137 | 0 | 4  | 1 | 1135 | 2231  | 1097  | 0 | 2074 |
| 5_(45)_13 | 1135 | m64196e_210606_053615/158335852/ccs | 99.561 | 1138 | 0 | 5  | 1 | 1135 | 8092  | 9227  | 0 | 2069 |
| 5_(45)_13 | 1135 | m64196e_210606_053615/107547197/ccs | 99.561 | 1138 | 0 | 5  | 1 | 1135 | 14324 | 13189 | 0 | 2069 |
| 5_(45)_13 | 1135 | m64196e_210606_053615/7080317/ccs   | 99.386 | 1140 | 0 | 7  | 1 | 1135 | 13799 | 14936 | 0 | 2060 |
| 5_(45)_13 | 1135 | m64196e_210606_053615/125043167/ccs | 99.212 | 1142 | 0 | 7  | 1 | 1135 | 153   | 1292  | 0 | 2050 |
| 5_(45)_13 | 1135 | m64198e_210604_164159/135858999/ccs | 99.296 | 1137 | 0 | 8  | 1 | 1135 | 8218  | 7088  | 0 | 2049 |
| 5_(45)_13 | 1135 | m64198e_210604_164159/133693958/ccs | 99.211 | 1140 | 1 | 8  | 1 | 1135 | 1622  | 486   | 0 | 2049 |
| 5_(45)_13 | 1135 | m64196e_210606_053615/32244296/ccs  | 99.034 | 1139 | 2 | 8  | 1 | 1135 | 2772  | 3905  | 0 | 2034 |
| 5_(45)_13 | 1135 | m64198e_210604_164159/37094240/ccs  | 99.033 | 1138 | 0 | 11 | 1 | 1135 | 9152  | 8023  | 0 | 2030 |
| 12_(45)_3 | 1135 | m64196e_210606_053615/105317927/ccs | 100    | 1135 | 0 | 0  | 1 | 1135 | 10574 | 9440  | 0 | 2097 |
| 12_(45)_3 | 1135 | m64196e_210606_053615/100993819/ccs | 100    | 1135 | 0 | 0  | 1 | 1135 | 7172  | 8306  | 0 | 2097 |
| 12_(45)_3 | 1135 | m64196e_210606_053615/65800053/ccs  | 100    | 1135 | 0 | 0  | 1 | 1135 | 4603  | 5737  | 0 | 2097 |

|           |      |                                     |        |      |   |   |   |      |       |       |   |      |
|-----------|------|-------------------------------------|--------|------|---|---|---|------|-------|-------|---|------|
| 12_(45)_3 | 1135 | m64196e_210606_053615/37749245/ccs  | 100    | 1135 | 0 | 0 | 1 | 1135 | 11184 | 10050 | 0 | 2097 |
| 12_(45)_3 | 1135 | m64196e_210606_053615/26608950/ccs  | 100    | 1135 | 0 | 0 | 1 | 1135 | 11505 | 12639 | 0 | 2097 |
| 12_(45)_3 | 1135 | m64198e_210604_164159/176097193/ccs | 100    | 1135 | 0 | 0 | 1 | 1135 | 5373  | 6507  | 0 | 2097 |
| 12_(45)_3 | 1135 | m64198e_210604_164159/174392410/ccs | 100    | 1135 | 0 | 0 | 1 | 1135 | 2977  | 4111  | 0 | 2097 |
| 12_(45)_3 | 1135 | m64198e_210604_164159/167709143/ccs | 100    | 1135 | 0 | 0 | 1 | 1135 | 9580  | 8446  | 0 | 2097 |
| 12_(45)_3 | 1135 | m64198e_210604_164159/136512688/ccs | 100    | 1135 | 0 | 0 | 1 | 1135 | 9010  | 10144 | 0 | 2097 |
| 12_(45)_3 | 1135 | m64198e_210604_164159/127273428/ccs | 100    | 1135 | 0 | 0 | 1 | 1135 | 3392  | 4526  | 0 | 2097 |
| 12_(45)_3 | 1135 | m64198e_210604_164159/105709835/ccs | 100    | 1135 | 0 | 0 | 1 | 1135 | 9552  | 8418  | 0 | 2097 |
| 12_(45)_3 | 1135 | m64198e_210604_164159/66912495/ccs  | 100    | 1135 | 0 | 0 | 1 | 1135 | 12942 | 11808 | 0 | 2097 |
| 12_(45)_3 | 1135 | m64198e_210604_164159/63505126/ccs  | 100    | 1135 | 0 | 0 | 1 | 1135 | 3728  | 2594  | 0 | 2097 |
| 12_(45)_3 | 1135 | m64198e_210604_164159/35587508/ccs  | 100    | 1135 | 0 | 0 | 1 | 1135 | 8294  | 7160  | 0 | 2097 |
| 12_(45)_3 | 1135 | m64198e_210604_164159/19202151/ccs  | 100    | 1135 | 0 | 0 | 1 | 1135 | 3079  | 1945  | 0 | 2097 |
| 12_(45)_3 | 1135 | m64198e_210604_164159/5310040/ccs   | 100    | 1135 | 0 | 0 | 1 | 1135 | 15751 | 16885 | 0 | 2097 |
| 12_(45)_3 | 1135 | m64196e_210606_053615/89260452/ccs  | 99.912 | 1136 | 0 | 1 | 1 | 1135 | 8148  | 9283  | 0 | 2091 |
| 12_(45)_3 | 1135 | m64196e_210606_053615/55577215/ccs  | 99.912 | 1136 | 0 | 1 | 1 | 1135 | 3493  | 2358  | 0 | 2091 |
| 12_(45)_3 | 1135 | m64198e_210604_164159/126354224/ccs | 99.912 | 1136 | 0 | 1 | 1 | 1135 | 1351  | 216   | 0 | 2091 |
| 12_(45)_3 | 1135 | m64198e_210604_164159/124518922/ccs | 99.912 | 1136 | 0 | 1 | 1 | 1135 | 1277  | 2412  | 0 | 2091 |
| 12_(45)_3 | 1135 | m64198e_210604_164159/72811937/ccs  | 99.912 | 1136 | 0 | 1 | 1 | 1135 | 13781 | 12646 | 0 | 2091 |
| 12_(45)_3 | 1135 | m64198e_210604_164159/33098266/ccs  | 99.912 | 1136 | 0 | 1 | 1 | 1135 | 11015 | 9880  | 0 | 2091 |
| 12_(45)_3 | 1135 | m64196e_210606_053615/154994113/ccs | 99.912 | 1135 | 0 | 1 | 1 | 1135 | 5688  | 6821  | 0 | 2089 |
| 12_(45)_3 | 1135 | m64196e_210606_053615/121176669/ccs | 99.912 | 1135 | 0 | 1 | 1 | 1135 | 4383  | 5516  | 0 | 2089 |
| 12_(45)_3 | 1135 | m64196e_210606_053615/52757255/ccs  | 99.912 | 1135 | 0 | 1 | 1 | 1135 | 3108  | 1975  | 0 | 2089 |
| 12_(45)_3 | 1135 | m64196e_210606_053615/31065808/ccs  | 99.912 | 1135 | 0 | 1 | 1 | 1135 | 9692  | 10825 | 0 | 2089 |
| 12_(45)_3 | 1135 | m64198e_210604_164159/107610992/ccs | 99.912 | 1135 | 0 | 1 | 1 | 1135 | 38    | 1171  | 0 | 2089 |
| 12_(45)_3 | 1135 | m64198e_210604_164159/71174602/ccs  | 99.912 | 1135 | 0 | 1 | 1 | 1135 | 7667  | 8800  | 0 | 2089 |

|            |      |                                     |        |      |   |    |    |      |       |       |   |      |
|------------|------|-------------------------------------|--------|------|---|----|----|------|-------|-------|---|------|
| 12_(45)_3  | 1135 | m64198e_210604_164159/34801860/ccs  | 99.912 | 1135 | 0 | 1  | 1  | 1135 | 4629  | 3496  | 0 | 2089 |
| 12_(45)_3  | 1135 | m64196e_210606_053615/103418033/ccs | 99.824 | 1136 | 0 | 2  | 1  | 1135 | 6779  | 5645  | 0 | 2085 |
| 12_(45)_3  | 1135 | m64198e_210604_164159/134415309/ccs | 99.824 | 1136 | 0 | 2  | 1  | 1135 | 7227  | 8361  | 0 | 2085 |
| 12_(45)_3  | 1135 | m64196e_210606_053615/170068722/ccs | 99.736 | 1138 | 0 | 3  | 1  | 1135 | 12382 | 13519 | 0 | 2082 |
| 12_(45)_3  | 1135 | m64198e_210604_164159/125962367/ccs | 99.736 | 1138 | 0 | 3  | 1  | 1135 | 2557  | 3694  | 0 | 2082 |
| 12_(45)_3  | 1135 | m64198e_210604_164159/64421965/ccs  | 99.736 | 1138 | 0 | 3  | 1  | 1135 | 11881 | 10744 | 0 | 2082 |
| 12_(45)_3  | 1135 | m64196e_210606_053615/168233130/ccs | 99.736 | 1137 | 0 | 3  | 1  | 1135 | 9932  | 11067 | 0 | 2080 |
| 12_(45)_3  | 1135 | m64196e_210606_053615/121766818/ccs | 99.736 | 1137 | 0 | 3  | 1  | 1135 | 5952  | 4817  | 0 | 2080 |
| 12_(45)_3  | 1135 | m64196e_210606_053615/112198063/ccs | 99.736 | 1137 | 0 | 3  | 1  | 1135 | 7908  | 6773  | 0 | 2080 |
| 12_(45)_3  | 1135 | m64198e_210604_164159/112525828/ccs | 99.649 | 1139 | 0 | 4  | 1  | 1135 | 699   | 1837  | 0 | 2078 |
| 12_(45)_3  | 1135 | m64198e_210604_164159/71239895/ccs  | 99.649 | 1138 | 0 | 4  | 1  | 1135 | 5650  | 4514  | 0 | 2076 |
| 12_(45)_3  | 1135 | m64196e_210606_053615/45679615/ccs  | 99.648 | 1137 | 0 | 3  | 1  | 1135 | 11628 | 12762 | 0 | 2074 |
| 12_(45)_3  | 1135 | m64196e_210606_053615/149029009/ccs | 99.383 | 1135 | 0 | 6  | 1  | 1135 | 3457  | 2330  | 0 | 2050 |
| 12_(45)_3  | 1135 | m64196e_210606_053615/68682829/ccs  | 98.954 | 1147 | 0 | 12 | 1  | 1135 | 7133  | 5987  | 0 | 2041 |
| 12_(45)_3  | 1135 | m64196e_210606_053615/33489160/ccs  | 99.91  | 1109 | 0 | 1  | 27 | 1135 | 1     | 1108  | 0 | 2041 |
| 12_(45)_13 | 1135 | m64198e_210604_164159/114690884/ccs | 99.824 | 1135 | 0 | 2  | 1  | 1135 | 12111 | 10979 | 0 | 2084 |
| 4_(47)_5   | 1132 | m64196e_210606_053615/157549741/ccs | 100    | 1132 | 0 | 0  | 1  | 1132 | 4452  | 3321  | 0 | 2091 |
| 4_(47)_5   | 1132 | m64196e_210606_053615/147260399/ccs | 100    | 1132 | 0 | 0  | 1  | 1132 | 12393 | 13524 | 0 | 2091 |
| 4_(47)_5   | 1132 | m64196e_210606_053615/137560256/ccs | 100    | 1132 | 0 | 0  | 1  | 1132 | 10552 | 9421  | 0 | 2091 |
| 4_(47)_5   | 1132 | m64196e_210606_053615/135987378/ccs | 100    | 1132 | 0 | 0  | 1  | 1132 | 9756  | 10887 | 0 | 2091 |
| 4_(47)_5   | 1132 | m64196e_210606_053615/115935396/ccs | 100    | 1132 | 0 | 0  | 1  | 1132 | 10833 | 9702  | 0 | 2091 |
| 4_(47)_5   | 1132 | m64196e_210606_053615/99354429/ccs  | 100    | 1132 | 0 | 0  | 1  | 1132 | 2145  | 1014  | 0 | 2091 |
| 4_(47)_5   | 1132 | m64196e_210606_053615/96141790/ccs  | 100    | 1132 | 0 | 0  | 1  | 1132 | 9367  | 8236  | 0 | 2091 |
| 4_(47)_5   | 1132 | m64196e_210606_053615/90704164/ccs  | 100    | 1132 | 0 | 0  | 1  | 1132 | 13900 | 12769 | 0 | 2091 |
| 4_(47)_5   | 1132 | m64196e_210606_053615/77138567/ccs  | 100    | 1132 | 0 | 0  | 1  | 1132 | 4808  | 5939  | 0 | 2091 |

|          |      |                                     |        |      |   |   |   |      |       |       |   |      |
|----------|------|-------------------------------------|--------|------|---|---|---|------|-------|-------|---|------|
| 4_(47)_5 | 1132 | m64196e_210606_053615/76219851/ccs  | 100    | 1132 | 0 | 0 | 1 | 1132 | 13666 | 12535 | 0 | 2091 |
| 4_(47)_5 | 1132 | m64196e_210606_053615/17564529/ccs  | 100    | 1132 | 0 | 0 | 1 | 1132 | 8918  | 10049 | 0 | 2091 |
| 4_(47)_5 | 1132 | m64196e_210606_053615/459770/ccs    | 100    | 1132 | 0 | 0 | 1 | 1132 | 9041  | 10172 | 0 | 2091 |
| 4_(47)_5 | 1132 | m64198e_210604_164159/165086145/ccs | 100    | 1132 | 0 | 0 | 1 | 1132 | 7306  | 6175  | 0 | 2091 |
| 4_(47)_5 | 1132 | m64198e_210604_164159/161743238/ccs | 100    | 1132 | 0 | 0 | 1 | 1132 | 1676  | 545   | 0 | 2091 |
| 4_(47)_5 | 1132 | m64198e_210604_164159/135268945/ccs | 100    | 1132 | 0 | 0 | 1 | 1132 | 5202  | 6333  | 0 | 2091 |
| 4_(47)_5 | 1132 | m64198e_210604_164159/77203111/ccs  | 100    | 1132 | 0 | 0 | 1 | 1132 | 11110 | 9979  | 0 | 2091 |
| 4_(47)_5 | 1132 | m64198e_210604_164159/69471048/ccs  | 100    | 1132 | 0 | 0 | 1 | 1132 | 3824  | 2693  | 0 | 2091 |
| 4_(47)_5 | 1132 | m64198e_210604_164159/56295987/ccs  | 100    | 1132 | 0 | 0 | 1 | 1132 | 7808  | 8939  | 0 | 2091 |
| 4_(47)_5 | 1132 | m64198e_210604_164159/43189199/ccs  | 100    | 1132 | 0 | 0 | 1 | 1132 | 4261  | 3130  | 0 | 2091 |
| 4_(47)_5 | 1132 | m64198e_210604_164159/9437630/ccs   | 100    | 1132 | 0 | 0 | 1 | 1132 | 7004  | 8135  | 0 | 2091 |
| 4_(47)_5 | 1132 | m64196e_210606_053615/109970499/ccs | 99.912 | 1133 | 0 | 1 | 1 | 1132 | 14450 | 13318 | 0 | 2085 |
| 4_(47)_5 | 1132 | m64196e_210606_053615/70649219/ccs  | 99.912 | 1133 | 0 | 1 | 1 | 1132 | 10955 | 9823  | 0 | 2085 |
| 4_(47)_5 | 1132 | m64196e_210606_053615/57476323/ccs  | 99.912 | 1133 | 0 | 1 | 1 | 1132 | 4167  | 3035  | 0 | 2085 |
| 4_(47)_5 | 1132 | m64196e_210606_053615/29557122/ccs  | 99.912 | 1133 | 0 | 1 | 1 | 1132 | 3213  | 2081  | 0 | 2085 |
| 4_(47)_5 | 1132 | m64198e_210604_164159/162201940/ccs | 99.912 | 1133 | 0 | 1 | 1 | 1132 | 6062  | 7194  | 0 | 2085 |
| 4_(47)_5 | 1132 | m64198e_210604_164159/93783397/ccs  | 99.912 | 1133 | 0 | 1 | 1 | 1132 | 8760  | 7628  | 0 | 2085 |
| 4_(47)_5 | 1132 | m64198e_210604_164159/50659414/ccs  | 99.912 | 1133 | 0 | 1 | 1 | 1132 | 14276 | 13144 | 0 | 2085 |
| 4_(47)_5 | 1132 | m64198e_210604_164159/43125026/ccs  | 99.912 | 1133 | 0 | 1 | 1 | 1132 | 8235  | 9367  | 0 | 2085 |
| 4_(47)_5 | 1132 | m64198e_210604_164159/32769550/ccs  | 99.912 | 1133 | 0 | 1 | 1 | 1132 | 5372  | 6504  | 0 | 2085 |
| 4_(47)_5 | 1132 | m64196e_210606_053615/49219513/ccs  | 99.912 | 1132 | 0 | 1 | 1 | 1132 | 12779 | 11649 | 0 | 2084 |
| 4_(47)_5 | 1132 | m64196e_210606_053615/12192123/ccs  | 99.912 | 1132 | 0 | 1 | 1 | 1132 | 2846  | 3976  | 0 | 2084 |
| 4_(47)_5 | 1132 | m64198e_210604_164159/160890992/ccs | 99.912 | 1132 | 0 | 1 | 1 | 1132 | 19031 | 17901 | 0 | 2084 |
| 4_(47)_5 | 1132 | m64198e_210604_164159/23135579/ccs  | 99.912 | 1132 | 0 | 1 | 1 | 1132 | 8906  | 7776  | 0 | 2084 |
| 4_(47)_5 | 1132 | m64196e_210606_053615/160500546/ccs | 99.824 | 1134 | 0 | 2 | 1 | 1132 | 12780 | 11647 | 0 | 2082 |

|          |      |                                     |        |      |   |   |   |      |       |       |   |      |
|----------|------|-------------------------------------|--------|------|---|---|---|------|-------|-------|---|------|
| 4_(47)_5 | 1132 | m64196e_210606_053615/2688251/ccs   | 99.824 | 1134 | 0 | 2 | 1 | 1132 | 9263  | 8130  | 0 | 2082 |
| 4_(47)_5 | 1132 | m64198e_210604_164159/86312640/ccs  | 99.824 | 1134 | 0 | 2 | 1 | 1132 | 9988  | 8855  | 0 | 2082 |
| 4_(47)_5 | 1132 | m64198e_210604_164159/28967841/ccs  | 99.824 | 1134 | 0 | 2 | 1 | 1132 | 9645  | 10778 | 0 | 2082 |
| 4_(47)_5 | 1132 | m64196e_210606_053615/173146218/ccs | 99.823 | 1133 | 0 | 2 | 1 | 1132 | 6991  | 8122  | 0 | 2080 |
| 4_(47)_5 | 1132 | m64196e_210606_053615/144640565/ccs | 99.823 | 1132 | 2 | 0 | 1 | 1132 | 10517 | 11648 | 0 | 2080 |
| 4_(47)_5 | 1132 | m64196e_210606_053615/139003365/ccs | 99.823 | 1133 | 0 | 2 | 1 | 1132 | 1318  | 2449  | 0 | 2080 |
| 4_(47)_5 | 1132 | m64196e_210606_053615/48958105/ccs  | 99.823 | 1132 | 2 | 0 | 1 | 1132 | 10938 | 12069 | 0 | 2080 |
| 4_(47)_5 | 1132 | m64198e_210604_164159/157354289/ccs | 99.823 | 1132 | 2 | 0 | 1 | 1132 | 14373 | 13242 | 0 | 2080 |
| 4_(47)_5 | 1132 | m64196e_210606_053615/92080280/ccs  | 99.823 | 1132 | 0 | 2 | 1 | 1132 | 10835 | 11964 | 0 | 2078 |
| 4_(47)_5 | 1132 | m64196e_210606_053615/43582480/ccs  | 99.823 | 1132 | 0 | 2 | 1 | 1132 | 4509  | 3380  | 0 | 2078 |
| 4_(47)_5 | 1132 | m64196e_210606_053615/101254517/ccs | 99.736 | 1135 | 0 | 3 | 1 | 1132 | 4719  | 5853  | 0 | 2076 |
| 4_(47)_5 | 1132 | m64196e_210606_053615/37356865/ccs  | 99.911 | 1128 | 0 | 1 | 5 | 1132 | 1     | 1127  | 0 | 2076 |
| 4_(47)_5 | 1132 | m64196e_210606_053615/156696682/ccs | 99.735 | 1133 | 2 | 1 | 1 | 1132 | 9376  | 8244  | 0 | 2074 |
| 4_(47)_5 | 1132 | m64196e_210606_053615/146539901/ccs | 99.735 | 1133 | 2 | 1 | 1 | 1132 | 14996 | 13864 | 0 | 2074 |
| 4_(47)_5 | 1132 | m64196e_210606_053615/64815883/ccs  | 99.735 | 1134 | 0 | 3 | 1 | 1132 | 7085  | 5953  | 0 | 2074 |
| 4_(47)_5 | 1132 | m64196e_210606_053615/8587174/ccs   | 99.735 | 1133 | 2 | 1 | 1 | 1132 | 12589 | 11457 | 0 | 2074 |
| 4_(47)_5 | 1132 | m64196e_210606_053615/177997593/ccs | 99.735 | 1133 | 0 | 3 | 1 | 1132 | 11697 | 12827 | 0 | 2073 |
| 4_(47)_5 | 1132 | m64196e_210606_053615/90112787/ccs  | 99.648 | 1135 | 0 | 4 | 1 | 1132 | 12171 | 13304 | 0 | 2071 |
| 4_(47)_5 | 1132 | m64198e_210604_164159/176293865/ccs | 99.735 | 1132 | 0 | 3 | 1 | 1132 | 13455 | 14583 | 0 | 2071 |
| 4_(47)_5 | 1132 | m64198e_210604_164159/99878747/ccs  | 99.648 | 1135 | 1 | 3 | 1 | 1132 | 6555  | 5421  | 0 | 2071 |
| 4_(47)_5 | 1132 | m64196e_210606_053615/68878824/ccs  | 99.647 | 1134 | 0 | 4 | 1 | 1131 | 12978 | 14110 | 0 | 2069 |
| 4_(47)_5 | 1132 | m64198e_210604_164159/125108470/ccs | 99.647 | 1134 | 0 | 4 | 1 | 1132 | 15843 | 14712 | 0 | 2069 |
| 4_(47)_5 | 1132 | m64198e_210604_164159/175702403/ccs | 99.559 | 1135 | 2 | 3 | 1 | 1132 | 8204  | 7070  | 0 | 2065 |
| 4_(47)_5 | 1132 | m64198e_210604_164159/110495382/ccs | 99.559 | 1135 | 0 | 5 | 1 | 1132 | 4516  | 3384  | 0 | 2063 |
| 4_(47)_5 | 1132 | m64196e_210606_053615/16384663/ccs  | 99.472 | 1137 | 0 | 6 | 1 | 1132 | 15080 | 16215 | 0 | 2061 |

|          |      |                                     |        |      |   |    |   |      |       |       |   |      |
|----------|------|-------------------------------------|--------|------|---|----|---|------|-------|-------|---|------|
| 4_(47)_5 | 1132 | m64198e_210604_164159/22021958/ccs  | 99.382 | 1133 | 4 | 3  | 1 | 1132 | 2370  | 1240  | 0 | 2050 |
| 4_(47)_5 | 1132 | m64196e_210606_053615/137954358/ccs | 99.296 | 1137 | 0 | 8  | 1 | 1132 | 12882 | 11749 | 0 | 2049 |
| 4_(47)_5 | 1132 | m64198e_210604_164159/97127016/ccs  | 99.382 | 1132 | 2 | 5  | 1 | 1132 | 8625  | 9751  | 0 | 2047 |
| 4_(47)_5 | 1132 | m64198e_210604_164159/27855579/ccs  | 99.295 | 1135 | 2 | 6  | 1 | 1132 | 7992  | 9123  | 0 | 2047 |
| 4_(47)_5 | 1132 | m64196e_210606_053615/101580999/ccs | 99.208 | 1137 | 1 | 8  | 1 | 1132 | 313   | 1446  | 0 | 2043 |
| 4_(47)_5 | 1132 | m64198e_210604_164159/146997272/ccs | 98.946 | 1139 | 2 | 9  | 1 | 1132 | 7824  | 8959  | 0 | 2028 |
| 4_(47)_5 | 1132 | m64198e_210604_164159/122356559/ccs | 98.858 | 1138 | 1 | 12 | 1 | 1132 | 1636  | 2767  | 0 | 2019 |
| 4_(47)_5 | 1132 | m64198e_210604_164159/82512092/ccs  | 98.368 | 1103 | 2 | 14 | 1 | 1087 | 17019 | 18121 | 0 | 1923 |
| 4_(47)_5 | 1132 | m64196e_210606_053615/24905569/ccs  | 96.752 | 1170 | 0 | 37 | 1 | 1132 | 14380 | 13211 | 0 | 1916 |
| 2_(47)_9 | 1132 | m64196e_210606_053615/158335768/ccs | 100    | 1132 | 0 | 0  | 1 | 1132 | 4231  | 5362  | 0 | 2091 |
| 2_(47)_9 | 1132 | m64196e_210606_053615/128911629/ccs | 100    | 1132 | 0 | 0  | 1 | 1132 | 1854  | 723   | 0 | 2091 |
| 2_(47)_9 | 1132 | m64196e_210606_053615/92014713/ccs  | 100    | 1132 | 0 | 0  | 1 | 1132 | 1449  | 318   | 0 | 2091 |
| 2_(47)_9 | 1132 | m64196e_210606_053615/88605097/ccs  | 100    | 1132 | 0 | 0  | 1 | 1132 | 9781  | 10912 | 0 | 2091 |
| 2_(47)_9 | 1132 | m64196e_210606_053615/82903987/ccs  | 100    | 1132 | 0 | 0  | 1 | 1132 | 4357  | 3226  | 0 | 2091 |
| 2_(47)_9 | 1132 | m64196e_210606_053615/16516866/ccs  | 100    | 1132 | 0 | 0  | 1 | 1132 | 7932  | 9063  | 0 | 2091 |
| 2_(47)_9 | 1132 | m64196e_210606_053615/3410771/ccs   | 100    | 1132 | 0 | 0  | 1 | 1132 | 1354  | 223   | 0 | 2091 |
| 2_(47)_9 | 1132 | m64198e_210604_164159/175506471/ccs | 100    | 1132 | 0 | 0  | 1 | 1132 | 10064 | 11195 | 0 | 2091 |
| 2_(47)_9 | 1132 | m64198e_210604_164159/163447787/ccs | 100    | 1132 | 0 | 0  | 1 | 1132 | 12057 | 13188 | 0 | 2091 |
| 2_(47)_9 | 1132 | m64198e_210604_164159/156306188/ccs | 100    | 1132 | 0 | 0  | 1 | 1132 | 10752 | 11883 | 0 | 2091 |
| 2_(47)_9 | 1132 | m64198e_210604_164159/137037961/ccs | 100    | 1132 | 0 | 0  | 1 | 1132 | 9857  | 8726  | 0 | 2091 |
| 2_(47)_9 | 1132 | m64198e_210604_164159/135528947/ccs | 100    | 1132 | 0 | 0  | 1 | 1132 | 4521  | 5652  | 0 | 2091 |
| 2_(47)_9 | 1132 | m64198e_210604_164159/131467056/ccs | 100    | 1132 | 0 | 0  | 1 | 1132 | 10877 | 9746  | 0 | 2091 |
| 2_(47)_9 | 1132 | m64198e_210604_164159/86575291/ccs  | 100    | 1132 | 0 | 0  | 1 | 1132 | 12515 | 13646 | 0 | 2091 |
| 2_(47)_9 | 1132 | m64198e_210604_164159/68815528/ccs  | 100    | 1132 | 0 | 0  | 1 | 1132 | 11220 | 10089 | 0 | 2091 |
| 2_(47)_9 | 1132 | m64198e_210604_164159/68616777/ccs  | 100    | 1132 | 0 | 0  | 1 | 1132 | 10706 | 11837 | 0 | 2091 |

|              |      |                                     |        |      |    |    |   |      |       |       |   |      |
|--------------|------|-------------------------------------|--------|------|----|----|---|------|-------|-------|---|------|
| 2_(47)_9     | 1132 | m64198e_210604_164159/54984913/ccs  | 100    | 1132 | 0  | 0  | 1 | 1132 | 3447  | 4578  | 0 | 2091 |
| 2_(47)_9     | 1132 | m64198e_210604_164159/50465061/ccs  | 100    | 1132 | 0  | 0  | 1 | 1132 | 8798  | 9929  | 0 | 2091 |
| 2_(47)_9     | 1132 | m64196e_210606_053615/34998204/ccs  | 99.912 | 1133 | 0  | 1  | 1 | 1132 | 7946  | 6814  | 0 | 2085 |
| 2_(47)_9     | 1132 | m64198e_210604_164159/133170230/ccs | 99.912 | 1133 | 0  | 1  | 1 | 1132 | 1521  | 389   | 0 | 2085 |
| 2_(47)_9     | 1132 | m64196e_210606_053615/162792196/ccs | 99.912 | 1132 | 0  | 1  | 1 | 1132 | 2079  | 949   | 0 | 2084 |
| 2_(47)_9     | 1132 | m64198e_210604_164159/68288647/ccs  | 99.912 | 1132 | 0  | 1  | 1 | 1132 | 14439 | 15569 | 0 | 2084 |
| 2_(47)_9     | 1132 | m64198e_210604_164159/19137941/ccs  | 99.912 | 1132 | 0  | 1  | 1 | 1132 | 8234  | 9364  | 0 | 2084 |
| 2_(47)_9     | 1132 | m64198e_210604_164159/25692451/ccs  | 99.824 | 1134 | 0  | 2  | 1 | 1132 | 2815  | 1682  | 0 | 2082 |
| 2_(47)_9     | 1132 | m64198e_210604_164159/44499725/ccs  | 99.823 | 1133 | 0  | 2  | 1 | 1132 | 10736 | 9605  | 0 | 2080 |
| 2_(47)_9     | 1132 | m64198e_210604_164159/21497295/ccs  | 99.823 | 1133 | 0  | 2  | 1 | 1132 | 6200  | 5069  | 0 | 2080 |
| 2_(47)_9     | 1132 | m64196e_210606_053615/17500201/ccs  | 99.823 | 1132 | 0  | 2  | 1 | 1132 | 13321 | 12192 | 0 | 2078 |
| 2_(47)_9     | 1132 | m64196e_210606_053615/124715100/ccs | 99.735 | 1133 | 0  | 3  | 1 | 1132 | 11703 | 12833 | 0 | 2073 |
| 2_(47)_9     | 1132 | m64196e_210606_053615/65340591/ccs  | 99.648 | 1136 | 0  | 4  | 1 | 1132 | 12207 | 11072 | 0 | 2073 |
| 2_(47)_9     | 1132 | m64196e_210606_053615/50857515/ccs  | 99.648 | 1135 | 0  | 4  | 1 | 1132 | 7819  | 6686  | 0 | 2071 |
| 2_(47)_9     | 1132 | m64198e_210604_164159/148243803/ccs | 99.648 | 1135 | 0  | 4  | 1 | 1132 | 8865  | 7732  | 0 | 2071 |
| 2_(47)_9     | 1132 | m64198e_210604_164159/79364413/ccs  | 99.647 | 1134 | 0  | 4  | 1 | 1132 | 1360  | 229   | 0 | 2069 |
| 2_(47)_9     | 1132 | m64196e_210606_053615/141557796/ccs | 99.384 | 1136 | 0  | 6  | 1 | 1132 | 4528  | 5660  | 0 | 2052 |
| 2_(47)_9     | 1132 | m64198e_210604_164159/37421888/ccs  | 99.119 | 1135 | 0  | 10 | 1 | 1132 | 7058  | 8185  | 0 | 2032 |
| 2_(47)_9     | 1132 | m64198e_210604_164159/144638676/ccs | 96.643 | 1132 | 38 | 0  | 1 | 1132 | 5895  | 7026  | 0 | 1881 |
| 2_(47)_9     | 1132 | m64198e_210604_164159/144574405/ccs | 96.643 | 1132 | 38 | 0  | 1 | 1132 | 6743  | 7874  | 0 | 1881 |
| 12_(48)_(-6) | 1100 | m64196e_210606_053615/155976263/ccs | 100    | 1100 | 0  | 0  | 1 | 1100 | 6257  | 7356  | 0 | 2032 |
| 12_(48)_(-6) | 1100 | m64196e_210606_053615/143066932/ccs | 100    | 1100 | 0  | 0  | 1 | 1100 | 300   | 1399  | 0 | 2032 |
| 12_(48)_(-6) | 1100 | m64196e_210606_053615/138545139/ccs | 100    | 1100 | 0  | 0  | 1 | 1100 | 13406 | 12307 | 0 | 2032 |
| 12_(48)_(-6) | 1100 | m64196e_210606_053615/123799387/ccs | 100    | 1100 | 0  | 0  | 1 | 1100 | 7977  | 6878  | 0 | 2032 |
| 12_(48)_(-6) | 1100 | m64196e_210606_053615/104925586/ccs | 100    | 1100 | 0  | 0  | 1 | 1100 | 322   | 1421  | 0 | 2032 |

|              |      |                                     |        |      |   |   |   |      |       |       |   |      |
|--------------|------|-------------------------------------|--------|------|---|---|---|------|-------|-------|---|------|
| 12_(48)_(-6) | 1100 | m64196e_210606_053615/87753232/ccs  | 100    | 1100 | 0 | 0 | 1 | 1100 | 2948  | 4047  | 0 | 2032 |
| 12_(48)_(-6) | 1100 | m64196e_210606_053615/50135155/ccs  | 100    | 1100 | 0 | 0 | 1 | 1100 | 9171  | 10270 | 0 | 2032 |
| 12_(48)_(-6) | 1100 | m64196e_210606_053615/31786098/ccs  | 100    | 1100 | 0 | 0 | 1 | 1100 | 7981  | 9080  | 0 | 2032 |
| 12_(48)_(-6) | 1100 | m64196e_210606_053615/10095092/ccs  | 100    | 1100 | 0 | 0 | 1 | 1100 | 9638  | 10737 | 0 | 2032 |
| 12_(48)_(-6) | 1100 | m64198e_210604_164159/124520572/ccs | 100    | 1100 | 0 | 0 | 1 | 1100 | 13369 | 12270 | 0 | 2032 |
| 12_(48)_(-6) | 1100 | m64198e_210604_164159/124387751/ccs | 100    | 1100 | 0 | 0 | 1 | 1100 | 7535  | 6436  | 0 | 2032 |
| 12_(48)_(-6) | 1100 | m64198e_210604_164159/106759293/ccs | 100    | 1100 | 0 | 0 | 1 | 1100 | 5960  | 4861  | 0 | 2032 |
| 12_(48)_(-6) | 1100 | m64198e_210604_164159/89260464/ccs  | 100    | 1100 | 0 | 0 | 1 | 1100 | 11210 | 12309 | 0 | 2032 |
| 12_(48)_(-6) | 1100 | m64198e_210604_164159/86901158/ccs  | 100    | 1100 | 0 | 0 | 1 | 1100 | 6913  | 8012  | 0 | 2032 |
| 12_(48)_(-6) | 1100 | m64198e_210604_164159/78973503/ccs  | 100    | 1100 | 0 | 0 | 1 | 1100 | 11746 | 10647 | 0 | 2032 |
| 12_(48)_(-6) | 1100 | m64198e_210604_164159/63505126/ccs  | 100    | 1100 | 0 | 0 | 1 | 1100 | 15104 | 16203 | 0 | 2032 |
| 12_(48)_(-6) | 1100 | m64198e_210604_164159/56033281/ccs  | 100    | 1100 | 0 | 0 | 1 | 1100 | 8667  | 7568  | 0 | 2032 |
| 12_(48)_(-6) | 1100 | m64198e_210604_164159/47579872/ccs  | 100    | 1100 | 0 | 0 | 1 | 1100 | 2866  | 3965  | 0 | 2032 |
| 12_(48)_(-6) | 1100 | m64198e_210604_164159/43714468/ccs  | 100    | 1100 | 0 | 0 | 1 | 1100 | 5929  | 4830  | 0 | 2032 |
| 12_(48)_(-6) | 1100 | m64198e_210604_164159/15794803/ccs  | 100    | 1100 | 0 | 0 | 1 | 1100 | 4295  | 5394  | 0 | 2032 |
| 12_(48)_(-6) | 1100 | m64196e_210606_053615/155913026/ccs | 99.909 | 1100 | 1 | 0 | 1 | 1100 | 13835 | 12736 | 0 | 2026 |
| 12_(48)_(-6) | 1100 | m64198e_210604_164159/81003454/ccs  | 99.909 | 1101 | 0 | 1 | 1 | 1100 | 9295  | 10395 | 0 | 2026 |
| 12_(48)_(-6) | 1100 | m64196e_210606_053615/17500578/ccs  | 99.909 | 1100 | 0 | 1 | 1 | 1100 | 5026  | 3928  | 0 | 2025 |
| 12_(48)_(-6) | 1100 | m64196e_210606_053615/17433037/ccs  | 99.909 | 1100 | 0 | 1 | 1 | 1100 | 2753  | 3851  | 0 | 2025 |
| 12_(48)_(-6) | 1100 | m64198e_210604_164159/18547866/ccs  | 99.909 | 1100 | 0 | 1 | 1 | 1100 | 11922 | 10824 | 0 | 2025 |
| 12_(48)_(-6) | 1100 | m64196e_210606_053615/78971663/ccs  | 99.819 | 1102 | 0 | 2 | 1 | 1100 | 2003  | 902   | 0 | 2023 |
| 12_(48)_(-6) | 1100 | m64198e_210604_164159/126354224/ccs | 99.819 | 1102 | 0 | 2 | 1 | 1100 | 12726 | 13827 | 0 | 2023 |
| 12_(48)_(-6) | 1100 | m64198e_210604_164159/173999752/ccs | 99.818 | 1101 | 0 | 2 | 1 | 1100 | 3042  | 4141  | 0 | 2021 |
| 12_(48)_(-6) | 1100 | m64198e_210604_164159/125503977/ccs | 99.818 | 1101 | 0 | 2 | 1 | 1100 | 11182 | 12281 | 0 | 2021 |
| 12_(48)_(-6) | 1100 | m64198e_210604_164159/5310040/ccs   | 99.818 | 1101 | 0 | 2 | 1 | 1100 | 4373  | 3274  | 0 | 2021 |



|              |      |                                     |        |      |   |    |   |      |       |       |   |      |
|--------------|------|-------------------------------------|--------|------|---|----|---|------|-------|-------|---|------|
| 12_(48)_(-6) | 1100 | m64198e_210604_164159/115474503/ccs | 99.818 | 1100 | 0 | 2  | 1 | 1100 | 7818  | 8915  | 0 | 2019 |
| 12_(48)_(-6) | 1100 | m64196e_210606_053615/105776281/ccs | 99.728 | 1103 | 0 | 2  | 1 | 1100 | 10669 | 11771 | 0 | 2017 |
| 12_(48)_(-6) | 1100 | m64196e_210606_053615/172427839/ccs | 99.728 | 1101 | 0 | 3  | 1 | 1100 | 5091  | 6189  | 0 | 2013 |
| 12_(48)_(-6) | 1100 | m64196e_210606_053615/143720551/ccs | 99.728 | 1101 | 0 | 3  | 1 | 1100 | 8153  | 9251  | 0 | 2013 |
| 12_(48)_(-6) | 1100 | m64198e_210604_164159/94898360/ccs  | 99.728 | 1101 | 0 | 3  | 1 | 1100 | 551   | 1649  | 0 | 2013 |
| 12_(48)_(-6) | 1100 | m64198e_210604_164159/114294804/ccs | 99.637 | 1103 | 0 | 2  | 1 | 1100 | 4661  | 5762  | 0 | 2012 |
| 12_(48)_(-6) | 1100 | m64196e_210606_053615/149029009/ccs | 99.637 | 1102 | 0 | 4  | 1 | 1100 | 14812 | 15911 | 0 | 2010 |
| 12_(48)_(-6) | 1100 | m64198e_210604_164159/71893183/ccs  | 99.637 | 1101 | 0 | 4  | 1 | 1100 | 13405 | 12308 | 0 | 2008 |
| 12_(48)_(-6) | 1100 | m64198e_210604_164159/78252806/ccs  | 99.546 | 1101 | 0 | 5  | 1 | 1100 | 12154 | 11058 | 0 | 2001 |
| 12_(48)_(-6) | 1100 | m64196e_210606_053615/161481232/ccs | 99.188 | 1108 | 0 | 9  | 1 | 1100 | 2681  | 1575  | 0 | 1988 |
| 12_(48)_(-6) | 1100 | m64198e_210604_164159/113445713/ccs | 99.187 | 1107 | 2 | 6  | 1 | 1100 | 4281  | 3175  | 0 | 1988 |
| 12_(48)_(-6) | 1100 | m64198e_210604_164159/46137822/ccs  | 99.097 | 1108 | 1 | 9  | 1 | 1100 | 10088 | 8982  | 0 | 1982 |
| 12_(48)_(-6) | 1100 | m64198e_210604_164159/61670922/ccs  | 99.095 | 1105 | 0 | 10 | 1 | 1100 | 3315  | 4414  | 0 | 1977 |
| 12_(48)_(-6) | 1100 | m64198e_210604_164159/147393168/ccs | 99.093 | 1103 | 2 | 8  | 1 | 1100 | 8973  | 7876  | 0 | 1975 |
| 12_(48)_(-6) | 1100 | m64198e_210604_164159/114819579/ccs | 99.094 | 1104 | 1 | 9  | 1 | 1100 | 6660  | 5562  | 0 | 1975 |
| 12_(48)_(-6) | 1100 | m64198e_210604_164159/153094652/ccs | 98.914 | 1105 | 1 | 11 | 1 | 1100 | 4273  | 3175  | 0 | 1964 |
| 44_(48)_(+6) | 1100 | m64196e_210606_053615/117114124/ccs | 100    | 1100 | 0 | 0  | 1 | 1100 | 8967  | 10066 | 0 | 2032 |
| 44_(48)_(+6) | 1100 | m64196e_210606_053615/67568997/ccs  | 100    | 1100 | 0 | 0  | 1 | 1100 | 10070 | 8971  | 0 | 2032 |
| 44_(48)_(+6) | 1100 | m64196e_210606_053615/66127953/ccs  | 100    | 1100 | 0 | 0  | 1 | 1100 | 8595  | 7496  | 0 | 2032 |
| 44_(48)_(+6) | 1100 | m64196e_210606_053615/25755652/ccs  | 100    | 1100 | 0 | 0  | 1 | 1100 | 9297  | 10396 | 0 | 2032 |
| 44_(48)_(+6) | 1100 | m64196e_210606_053615/21563064/ccs  | 100    | 1100 | 0 | 0  | 1 | 1100 | 4025  | 2926  | 0 | 2032 |
| 44_(48)_(+6) | 1100 | m64196e_210606_053615/6425095/ccs   | 100    | 1100 | 0 | 0  | 1 | 1100 | 12084 | 10985 | 0 | 2032 |
| 44_(48)_(+6) | 1100 | m64198e_210604_164159/130025879/ccs | 100    | 1100 | 0 | 0  | 1 | 1100 | 980   | 2079  | 0 | 2032 |
| 44_(48)_(+6) | 1100 | m64198e_210604_164159/31981641/ccs  | 100    | 1100 | 0 | 0  | 1 | 1100 | 12017 | 10918 | 0 | 2032 |
| 44_(48)_(+6) | 1100 | m64198e_210604_164159/984146/ccs    | 100    | 1100 | 0 | 0  | 1 | 1100 | 7485  | 6386  | 0 | 2032 |

|              |      |                                     |        |      |   |   |   |      |       |       |   |      |
|--------------|------|-------------------------------------|--------|------|---|---|---|------|-------|-------|---|------|
| 44_(48)_(+6) | 1100 | m64196e_210606_053615/115018540/ccs | 99.909 | 1101 | 0 | 1 | 1 | 1100 | 12269 | 11169 | 0 | 2026 |
| 44_(48)_(+6) | 1100 | m64196e_210606_053615/73007997/ccs  | 99.909 | 1101 | 0 | 1 | 1 | 1100 | 1542  | 2642  | 0 | 2026 |
| 44_(48)_(+6) | 1100 | m64198e_210604_164159/172754514/ccs | 99.909 | 1101 | 0 | 1 | 1 | 1100 | 9743  | 8643  | 0 | 2026 |
| 44_(48)_(+6) | 1100 | m64198e_210604_164159/136840791/ccs | 99.909 | 1101 | 0 | 1 | 1 | 1100 | 9224  | 10324 | 0 | 2026 |
| 44_(48)_(+6) | 1100 | m64198e_210604_164159/37488937/ccs  | 99.909 | 1101 | 0 | 1 | 1 | 1100 | 11447 | 12547 | 0 | 2026 |
| 44_(48)_(+6) | 1100 | m64198e_210604_164159/163315883/ccs | 99.909 | 1100 | 0 | 1 | 1 | 1100 | 9421  | 10519 | 0 | 2025 |
| 44_(48)_(+6) | 1100 | m64198e_210604_164159/134023375/ccs | 99.909 | 1100 | 0 | 1 | 1 | 1100 | 8835  | 9933  | 0 | 2025 |
| 44_(48)_(+6) | 1100 | m64196e_210606_053615/173606627/ccs | 99.819 | 1102 | 0 | 2 | 1 | 1100 | 7716  | 6615  | 0 | 2023 |
| 44_(48)_(+6) | 1100 | m64196e_210606_053615/87688399/ccs  | 99.819 | 1102 | 0 | 2 | 1 | 1100 | 7186  | 6085  | 0 | 2023 |
| 44_(48)_(+6) | 1100 | m64198e_210604_164159/45088926/ccs  | 99.819 | 1102 | 0 | 2 | 1 | 1100 | 48    | 1149  | 0 | 2023 |
| 44_(48)_(+6) | 1100 | m64198e_210604_164159/13043557/ccs  | 99.819 | 1102 | 0 | 2 | 1 | 1100 | 6661  | 7762  | 0 | 2023 |
| 44_(48)_(+6) | 1100 | m64198e_210604_164159/133038789/ccs | 99.818 | 1101 | 0 | 2 | 1 | 1100 | 12128 | 13227 | 0 | 2021 |
| 44_(48)_(+6) | 1100 | m64198e_210604_164159/43977142/ccs  | 99.818 | 1101 | 0 | 2 | 1 | 1100 | 10    | 1109  | 0 | 2021 |
| 44_(48)_(+6) | 1100 | m64196e_210606_053615/143197999/ccs | 99.818 | 1100 | 0 | 2 | 1 | 1100 | 6654  | 7751  | 0 | 2019 |
| 44_(48)_(+6) | 1100 | m64198e_210604_164159/41287975/ccs  | 99.818 | 1100 | 0 | 2 | 1 | 1100 | 4485  | 5582  | 0 | 2019 |
| 44_(48)_(+6) | 1100 | m64196e_210606_053615/61868157/ccs  | 99.728 | 1103 | 0 | 3 | 1 | 1100 | 12432 | 11330 | 0 | 2017 |
| 44_(48)_(+6) | 1100 | m64198e_210604_164159/29818887/ccs  | 99.728 | 1102 | 1 | 2 | 1 | 1100 | 12959 | 11858 | 0 | 2017 |
| 44_(48)_(+6) | 1100 | m64196e_210606_053615/2032866/ccs   | 99.728 | 1102 | 0 | 3 | 1 | 1100 | 2824  | 1724  | 0 | 2015 |
| 44_(48)_(+6) | 1100 | m64196e_210606_053615/109512519/ccs | 99.728 | 1101 | 0 | 3 | 1 | 1100 | 13091 | 14189 | 0 | 2013 |
| 44_(48)_(+6) | 1100 | m64198e_210604_164159/6029350/ccs   | 99.728 | 1101 | 0 | 3 | 1 | 1100 | 10896 | 11994 | 0 | 2013 |
| 44_(48)_(+6) | 1100 | m64196e_210606_053615/62194227/ccs  | 99.636 | 1100 | 0 | 4 | 1 | 1100 | 13758 | 12663 | 0 | 2006 |
| 44_(48)_(+6) | 1100 | m64196e_210606_053615/111151897/ccs | 99.546 | 1102 | 0 | 5 | 1 | 1100 | 3993  | 2895  | 0 | 2002 |
| 44_(48)_(+6) | 1100 | m64198e_210604_164159/150930501/ccs | 99.546 | 1102 | 0 | 5 | 1 | 1100 | 10114 | 9016  | 0 | 2002 |
| 44_(48)_(+6) | 1100 | m64198e_210604_164159/100338251/ccs | 99.456 | 1103 | 1 | 5 | 1 | 1100 | 16388 | 17488 | 0 | 1999 |
| 44_(48)_(+6) | 1100 | m64198e_210604_164159/175571692/ccs | 99.455 | 1101 | 0 | 6 | 1 | 1100 | 2998  | 4093  | 0 | 1995 |

|              |      |                                     |        |      |   |    |   |      |       |       |   |      |
|--------------|------|-------------------------------------|--------|------|---|----|---|------|-------|-------|---|------|
| 44_(48)_(+6) | 1100 | m64198e_210604_164159/176685980/ccs | 99.275 | 1104 | 0 | 8  | 1 | 1100 | 11270 | 10171 | 0 | 1988 |
| 44_(48)_(+6) | 1100 | m64196e_210606_053615/85525462/ccs  | 99.187 | 1107 | 0 | 9  | 1 | 1100 | 4589  | 5693  | 0 | 1986 |
| 44_(48)_(+6) | 1100 | m64196e_210606_053615/157024504/ccs | 99.185 | 1104 | 2 | 7  | 1 | 1100 | 14438 | 13338 | 0 | 1982 |
| 44_(48)_(+6) | 1100 | m64196e_210606_053615/32638013/ccs  | 99.183 | 1102 | 0 | 9  | 1 | 1100 | 524   | 1618  | 0 | 1977 |
| 44_(48)_(+6) | 1100 | m64198e_210604_164159/106628567/ccs | 99.005 | 1105 | 1 | 10 | 1 | 1100 | 1224  | 125   | 0 | 1971 |
| 44_(48)_(+6) | 1100 | m64198e_210604_164159/48826536/ccs  | 98.826 | 1107 | 0 | 12 | 1 | 1100 | 15411 | 14311 | 0 | 1960 |
| 44_(48)_(+6) | 1100 | m64196e_210606_053615/139003203/ccs | 98.373 | 1106 | 0 | 18 | 1 | 1100 | 2670  | 1577  | 0 | 1927 |
| 12_(48)_(+6) | 1100 | m64196e_210606_053615/106890675/ccs | 98.913 | 1104 | 2 | 9  | 1 | 1100 | 10801 | 9704  | 0 | 1964 |

---

**Table S12. Potential paths and the number of long-reads.**

| Paths          | Number of supported long reads |
|----------------|--------------------------------|
| 1_(14_22_7)_10 | 0                              |
| 1_(14_22_7)_3  | 0                              |
| 9_(14_22_7)_10 | 0                              |
| 9_(14_22_7)_3  | 0                              |
| 10_(28)_11     | 1                              |
| 10_(28)_4      | 56                             |
| 8_(28)_11      | 54                             |
| 8_(28)_4       | 0                              |
| 48_(44)_2      | 1                              |
| 48_(44)_11     | 39                             |
| 8_(44)_11      | 0                              |
| 8_(44)_2       | 40                             |
| 12_(45)_13     | 1                              |
| 12_(45)_3      | 43                             |
| 5_(45)_13      | 28                             |
| 5_(45)_3       | 0                              |
| 2_(47)_5       | 0                              |
| 2_(47)_9       | 36                             |
| 4_(47)_5       | 68                             |
| 4_(47)_9       | 0                              |
| 12_(48)_(+6)   | 1                              |
| 12_(48)_(−6)   | 46                             |
| 44_(48)_(+6)   | 41                             |
| 44_(48)_(−6)   | 0                              |

**Table S13. RNA-editing in *M. elegans* mitogenome.**

| Gene | Nt Pos | AA Pos | Align Col | Effect             | Score | Editing Type |
|------|--------|--------|-----------|--------------------|-------|--------------|
| atp1 | 1168   | 390    | 392       | CGC (R) => TGC (C) | 1     | C=>T         |
| atp1 | 1292   | 431    | 433       | CCG (P) => CTG (L) | 0.8   | C=>T         |
| atp4 | 59     | 20     | 24        | TCT (S) => TTT (F) | 0.57  | C=>T         |
| atp4 | 71     | 24     | 28        | TCA (S) => TTA (L) | 1     | C=>T         |
| atp4 | 89     | 30     | 34        | TCA (S) => TTA (L) | 1     | C=>T         |
| atp4 | 118    | 40     | 44        | CGT (R) => TGT (C) | 0.71  | C=>T         |
| atp4 | 215    | 72     | 76        | TCG (S) => TTG (L) | 1     | C=>T         |
| atp4 | 226    | 76     | 80        | CCC (P) => TTC (F) | 0.57  | C=>T         |
| atp4 | 227    | 76     | 80        | CCC (P) => TTC (F) | 0.57  | C=>T         |
| atp4 | 248    | 83     | 87        | CCT (P) => CTT (L) | 1     | C=>T         |
| atp4 | 251    | 84     | 88        | CCG (P) => CTG (L) | 0.43  | C=>T         |
| atp4 | 395    | 132    | 140       | TCA (S) => TTA (L) | 1     | C=>T         |
| atp4 | 407    | 136    | 144       | CCA (P) => CTA (L) | 0.71  | C=>T         |
| atp4 | 416    | 139    | 147       | ACT (T) => ATT (I) | 0.86  | C=>T         |
| atp4 | 490    | 164    | 172       | CCC (P) => TCC (S) | 0.57  | C=>T         |
| atp6 | 334    | 112    | 113       | CCA (P) => TCA (S) | 0.75  | C=>T         |
| atp6 | 379    | 127    | 128       | CTT (L) => TTT (F) | 0.25  | C=>T         |
| atp6 | 413    | 138    | 139       | TCA (S) => TTA (L) | 1     | C=>T         |
| atp6 | 470    | 157    | 158       | TCG (S) => TTG (L) | 1     | C=>T         |
| atp6 | 521    | 174    | 175       | TCC (S) => TTC (F) | 1     | C=>T         |
| atp6 | 559    | 187    | 188       | CGT (R) => TGT (C) | 1     | C=>T         |
| atp6 | 698    | 233    | 234       | TCA (S) => TTA (L) | 1     | C=>T         |
| atp6 | 757    | 253    | 254       | CCT (P) => TCT (S) | 1     | C=>T         |
| atp6 | 760    | 254    | 255       | CAT (H) => TAT (Y) | 1     | C=>T         |
| atp6 | 782    | 261    | 262       | TCA (S) => TTA (L) | 1     | C=>T         |
| atp6 | 824    | 275    | 276       | TCA (S) => TTA (L) | 1     | C=>T         |
| atp6 | 896    | 299    | 300       | CCT (P) => CTT (L) | 0.92  | C=>T         |
| atp6 | 961    | 321    | 322       | CAT (H) => TAT (Y) | 1     | C=>T         |
| atp6 | 977    | 326    | 327       | TCA (S) => TTA (L) | 1     | C=>T         |
| atp6 | 1015   | 339    | 340       | CAA (Q) => TAA (X) | 1     | C=>T         |
| atp8 | 47     | 16     | 16        | TCA (S) => TTA (L) | 1     | C=>T         |
| atp9 | 20     | 7      | 7         | TCA (S) => TTA (L) | 1     | C=>T         |
| atp9 | 82     | 28     | 28        | CTT (L) => TTT (F) | 1     | C=>T         |
| ccmB | 28     | 10     | 10        | CAT (H) => TAT (Y) | 0.89  | C=>T         |
| ccmB | 71     | 24     | 26        | TCA (S) => TTA (L) | 1     | C=>T         |
| ccmB | 80     | 27     | 29        | TCG (S) => TTG (L) | 1     | C=>T         |
| ccmB | 128    | 43     | 45        | TCA (S) => TTA (L) | 1     | C=>T         |
| ccmB | 154    | 52     | 54        | CGG (R) => TGG (W) | 1     | C=>T         |
| ccmB | 160    | 54     | 56        | CCT (P) => TCT (S) | 0.67  | C=>T         |
| ccmB | 164    | 55     | 57        | CCG (P) => CTG (L) | 0.89  | C=>T         |

|      |     |     |     |                    |      |      |
|------|-----|-----|-----|--------------------|------|------|
| ccmB | 172 | 58  | 60  | CCT (P) => TCT (S) | 0.89 | C=>T |
| ccmB | 179 | 60  | 62  | CCT (P) => CTT (L) | 1    | C=>T |
| ccmB | 181 | 61  | 63  | CCC (P) => TCC (S) | 0.78 | C=>T |
| ccmB | 193 | 65  | 69  | CCT (P) => TTT (F) | 0.89 | C=>T |
| ccmB | 194 | 65  | 69  | CCT (P) => TTT (F) | 0.89 | C=>T |
| ccmB | 286 | 96  | 102 | CGG (R) => TGG (W) | 1    | C=>T |
| ccmB | 304 | 102 | 108 | CGT (R) => TGT (C) | 0.78 | C=>T |
| ccmB | 367 | 123 | 129 | CGG (R) => TGG (W) | 0.78 | C=>T |
| ccmB | 428 | 143 | 149 | TCG (S) => TTG (L) | 1    | C=>T |
| ccmB | 467 | 156 | 164 | TCG (S) => TTG (L) | 0.89 | C=>T |
| ccmB | 485 | 162 | 170 | TCA (S) => TTA (L) | 1    | C=>T |
| ccmB | 494 | 165 | 173 | TCA (S) => TTA (L) | 1    | C=>T |
| ccmB | 503 | 168 | 176 | TCA (S) => TTA (L) | 1    | C=>T |
| ccmB | 512 | 171 | 179 | TCT (S) => TTT (F) | 1    | C=>T |
| ccmB | 514 | 172 | 180 | CGT (R) => TGT (C) | 1    | C=>T |
| ccmB | 551 | 184 | 192 | TCA (S) => TTA (L) | 1    | C=>T |
| ccmB | 554 | 185 | 193 | TCG (S) => TTG (L) | 0.89 | C=>T |
| ccmB | 596 | 199 | 207 | TCG (S) => TTG (L) | 0.89 | C=>T |
| ccmB | 611 | 204 | 212 | TCA (S) => TTA (L) | 0.89 | C=>T |
| ccmC | 103 | 35  | 41  | CAT (H) => TAT (Y) | 1    | C=>T |
| ccmC | 184 | 62  | 68  | CGG (R) => TGG (W) | 1    | C=>T |
| ccmC | 281 | 94  | 100 | ACA (T) => ATA (I) | 0.56 | C=>T |
| ccmC | 299 | 100 | 106 | TCT (S) => TTT (F) | 1    | C=>T |
| ccmC | 331 | 111 | 117 | CGG (R) => TGG (W) | 1    | C=>T |
| ccmC | 395 | 132 | 138 | TCG (S) => TTG (L) | 1    | C=>T |
| ccmC | 400 | 134 | 140 | CTT (L) => TTT (F) | 0.89 | C=>T |
| ccmC | 436 | 146 | 152 | CCT (P) => TCT (S) | 0.89 | C=>T |
| ccmC | 446 | 149 | 155 | CCG (P) => CTG (L) | 0.78 | C=>T |
| ccmC | 451 | 151 | 157 | CCT (P) => TCT (S) | 1    | C=>T |
| ccmC | 458 | 153 | 159 | TCA (S) => TTA (L) | 0.78 | C=>T |
| ccmC | 463 | 155 | 161 | CGT (R) => TGT (C) | 1    | C=>T |
| ccmC | 467 | 156 | 162 | GCT (A) => GTT (V) | 0.78 | C=>T |
| ccmC | 473 | 158 | 164 | CCG (P) => CTG (L) | 1    | C=>T |
| ccmC | 497 | 166 | 172 | TCT (S) => TTT (F) | 1    | C=>T |
| ccmC | 521 | 174 | 180 | TCG (S) => TTG (L) | 1    | C=>T |
| ccmC | 548 | 183 | 189 | TCT (S) => TTT (F) | 1    | C=>T |
| ccmC | 568 | 190 | 196 | CCT (P) => TCT (S) | 1    | C=>T |
| ccmC | 605 | 202 | 208 | TCC (S) => TTC (F) | 1    | C=>T |
| ccmC | 614 | 205 | 211 | TCA (S) => TTA (L) | 0.78 | C=>T |
| ccmC | 619 | 207 | 213 | CGT (R) => TGT (C) | 0.78 | C=>T |
| ccmC | 650 | 217 | 223 | CCT (P) => CTT (L) | 0.78 | C=>T |
| ccmC | 656 | 219 | 225 | CCA (P) => CTA (L) | 0.89 | C=>T |

|       |      |     |     |                    |      |      |
|-------|------|-----|-----|--------------------|------|------|
| ccmC  | 665  | 222 | 228 | CCC (P) => CTC (L) | 0.78 | C=>T |
| ccmC  | 673  | 225 | 231 | CCT (P) => TCT (S) | 0.78 | C=>T |
| ccmFc | 38   | 13  | 13  | TCC (S) => TTC (F) | 0.83 | C=>T |
| ccmFc | 50   | 17  | 17  | CCT (P) => CTT (L) | 1    | C=>T |
| ccmFc | 103  | 35  | 35  | CCC (P) => TCC (S) | 1    | C=>T |
| ccmFc | 122  | 41  | 41  | TCC (S) => TTC (F) | 1    | C=>T |
| ccmFc | 151  | 51  | 51  | CCT (P) => TCT (S) | 0.83 | C=>T |
| ccmFc | 155  | 52  | 52  | TCA (S) => TTA (L) | 1    | C=>T |
| ccmFc | 310  | 104 | 104 | CGT (R) => TGT (C) | 0.5  | C=>T |
| ccmFc | 391  | 131 | 131 | CGT (R) => TGT (C) | 1    | C=>T |
| ccmFc | 406  | 136 | 136 | CGT (R) => TGT (C) | 0.83 | C=>T |
| ccmFc | 977  | 326 | 330 | TCA (S) => TTA (L) | 0.33 | C=>T |
| ccmFc | 1139 | 380 | 387 | CCA (P) => CTA (L) | 1    | C=>T |
| ccmFc | 1160 | 387 | 394 | TCG (S) => TTG (L) | 1    | C=>T |
| ccmFc | 1234 | 412 | 419 | CGG (R) => TGG (W) | 1    | C=>T |
| ccmFc | 1315 | 439 | 446 | CGA (R) => TGA (X) | 1    | C=>T |
| ccmFn | 38   | 13  | 15  | CCG (P) => CTG (L) | 1    | C=>T |
| ccmFn | 98   | 33  | 35  | CCT (P) => CTT (L) | 1    | C=>T |
| ccmFn | 151  | 51  | 53  | CCT (P) => TCT (S) | 0.83 | C=>T |
| ccmFn | 263  | 88  | 90  | CCA (P) => CTA (L) | 0.83 | C=>T |
| ccmFn | 283  | 95  | 97  | CTT (L) => TTT (F) | 0.83 | C=>T |
| ccmFn | 334  | 112 | 114 | CAT (H) => TAT (Y) | 0.67 | C=>T |
| ccmFn | 356  | 119 | 121 | TCC (S) => TTC (F) | 0.67 | C=>T |
| ccmFn | 365  | 122 | 124 | TCG (S) => TTG (L) | 0.67 | C=>T |
| ccmFn | 565  | 189 | 191 | CTT (L) => TTT (F) | 0.5  | C=>T |
| ccmFn | 712  | 238 | 240 | CCT (P) => TTT (F) | 0.67 | C=>T |
| ccmFn | 713  | 238 | 240 | CCT (P) => TTT (F) | 0.67 | C=>T |
| ccmFn | 722  | 241 | 243 | TCA (S) => TTA (L) | 0.83 | C=>T |
| ccmFn | 760  | 254 | 256 | CGT (R) => TGT (C) | 1    | C=>T |
| ccmFn | 782  | 261 | 263 | TCA (S) => TTA (L) | 1    | C=>T |
| ccmFn | 794  | 265 | 267 | CCA (P) => CTA (L) | 1    | C=>T |
| ccmFn | 809  | 270 | 272 | TCA (S) => TTA (L) | 1    | C=>T |
| ccmFn | 1276 | 426 | 446 | CGG (R) => TGG (W) | 1    | C=>T |
| ccmFn | 1304 | 435 | 455 | CCA (P) => CTA (L) | 1    | C=>T |
| ccmFn | 1321 | 441 | 461 | CAT (H) => TAT (Y) | 1    | C=>T |
| ccmFn | 1336 | 446 | 466 | CGG (R) => TGG (W) | 1    | C=>T |
| ccmFn | 1354 | 452 | 472 | CGG (R) => TGG (W) | 1    | C=>T |
| ccmFn | 1387 | 463 | 483 | CGG (R) => TGG (W) | 1    | C=>T |
| ccmFn | 1493 | 498 | 518 | TCT (S) => TTT (F) | 1    | C=>T |
| ccmFn | 1519 | 507 | 527 | CCC (P) => TCC (S) | 1    | C=>T |
| ccmFn | 1567 | 523 | 543 | CGG (R) => TGG (W) | 0.67 | C=>T |
| cob   | 140  | 47  | 48  | GCC (A) => GTC (V) | 0.92 | C=>T |

|      |      |     |     |                    |      |      |
|------|------|-----|-----|--------------------|------|------|
| cob  | 286  | 96  | 97  | CTC (L) => TTC (F) | 1    | C=>T |
| cob  | 298  | 100 | 101 | CAC (H) => TAC (Y) | 1    | C=>T |
| cob  | 568  | 190 | 191 | CAT (H) => TAT (Y) | 0.92 | C=>T |
| cob  | 680  | 227 | 228 | TCT (S) => TTT (F) | 1    | C=>T |
| cob  | 908  | 303 | 304 | CCA (P) => CTA (L) | 1    | C=>T |
| cob  | 1049 | 350 | 351 | GCG (A) => GTG (V) | 1    | C=>T |
| cob  | 1081 | 361 | 362 | CCT (P) => TCT (S) | 0.77 | C=>T |
| cox2 | 71   | 24  | 26  | TCT (S) => TTT (F) | 1    | C=>T |
| cox2 | 161  | 54  | 56  | TCA (S) => TTA (L) | 0.95 | C=>T |
| cox2 | 253  | 85  | 87  | CGG (R) => TGG (W) | 1    | C=>T |
| cox2 | 379  | 127 | 129 | CGG (R) => TGG (W) | 1    | C=>T |
| cox2 | 443  | 148 | 150 | ACG (T) => ATG (M) | 1    | C=>T |
| cox2 | 461  | 154 | 156 | CCA (P) => CTA (L) | 1    | C=>T |
| cox2 | 476  | 159 | 161 | TCA (S) => TTA (L) | 1    | C=>T |
| cox2 | 557  | 186 | 188 | CCT (P) => CTT (L) | 1    | C=>T |
| cox2 | 581  | 194 | 196 | TCA (S) => TTA (L) | 1    | C=>T |
| cox2 | 676  | 226 | 228 | CGT (R) => TGT (C) | 1    | C=>T |
| cox2 | 742  | 248 | 250 | CGG (R) => TGG (W) | 1    | C=>T |
| cox3 | 298  | 100 | 101 | CTT (L) => TTT (F) | 1    | C=>T |
| cox3 | 311  | 104 | 105 | TCT (S) => TTT (F) | 0.92 | C=>T |
| cox3 | 314  | 105 | 106 | TCT (S) => TTT (F) | 0.92 | C=>T |
| matR | 26   | 9   | 29  | CCC (P) => CTC (L) | 1    | C=>T |
| matR | 32   | 11  | 31  | TCC (S) => TTC (F) | 0.62 | C=>T |
| matR | 127  | 43  | 63  | CCT (P) => TCT (S) | 1    | C=>T |
| matR | 326  | 109 | 129 | CCA (P) => CTA (L) | 1    | C=>T |
| matR | 1187 | 396 | 421 | ACC (T) => ATC (I) | 1    | C=>T |
| matR | 1448 | 483 | 511 | GCC (A) => GTC (V) | 0.62 | C=>T |
| matR | 1541 | 514 | 542 | TCC (S) => TTC (F) | 1    | C=>T |
| matR | 1679 | 560 | 588 | TCC (S) => TTC (F) | 1    | C=>T |
| matR | 1700 | 567 | 595 | CCT (P) => CTT (L) | 1    | C=>T |
| matR | 1756 | 586 | 614 | CAC (H) => TAC (Y) | 1    | C=>T |
| mttB | 37   | 13  | 18  | CGG (R) => TGG (W) | 0.88 | C=>T |
| mttB | 73   | 25  | 30  | CGT (R) => TGT (C) | 0.88 | C=>T |
| mttB | 85   | 29  | 34  | CCG (P) => TCG (S) | 1    | C=>T |
| mttB | 104  | 35  | 40  | CCA (P) => CTA (L) | 1    | C=>T |
| mttB | 151  | 51  | 58  | CGT (R) => TGT (C) | 1    | C=>T |
| mttB | 161  | 54  | 61  | TCA (S) => TTA (L) | 0.75 | C=>T |
| mttB | 235  | 79  | 86  | CAT (H) => TAT (Y) | 1    | C=>T |
| mttB | 304  | 102 | 109 | CAT (H) => TAT (Y) | 0.62 | C=>T |
| mttB | 319  | 107 | 114 | CGC (R) => TGC (C) | 0.88 | C=>T |
| mttB | 352  | 118 | 125 | CGG (R) => TGG (W) | 0.62 | C=>T |
| mttB | 380  | 127 | 134 | CCA (P) => CTA (L) | 0.75 | C=>T |



|      |      |     |     |                    |      |      |
|------|------|-----|-----|--------------------|------|------|
| mttB | 410  | 137 | 144 | TCG (S) => TTG (L) | 0.57 | C=>T |
| mttB | 445  | 149 | 156 | CAT (H) => TAT (Y) | 0.88 | C=>T |
| mttB | 470  | 157 | 164 | TCG (S) => TTG (L) | 0.88 | C=>T |
| mttB | 514  | 172 | 179 | CGT (R) => TGT (C) | 0.88 | C=>T |
| mttB | 521  | 174 | 181 | CCA (P) => CTA (L) | 0.62 | C=>T |
| mttB | 527  | 176 | 183 | CCA (P) => CTA (L) | 0.5  | C=>T |
| mttB | 583  | 195 | 202 | CCG (P) => TCG (S) | 1    | C=>T |
| mttB | 640  | 214 | 221 | CGT (R) => TGT (C) | 0.62 | C=>T |
| mttB | 686  | 229 | 236 | TCG (S) => TTG (L) | 0.75 | C=>T |
| mttB | 743  | 248 | 255 | ACT (T) => ATT (I) | 0.67 | C=>T |
| nad1 | 2    | 1   | 4   | ACG (T) => ATG (M) | 0.8  | C=>T |
| nad1 | 215  | 72  | 75  | TCC (S) => TTC (F) | 0.9  | C=>T |
| nad1 | 265  | 89  | 92  | CGG (R) => TGG (W) | 1    | C=>T |
| nad1 | 308  | 103 | 106 | CCG (P) => CTG (L) | 1    | C=>T |
| nad1 | 436  | 146 | 149 | CCT (P) => TCT (S) | 0.9  | C=>T |
| nad1 | 490  | 164 | 167 | CCT (P) => TCT (S) | 1    | C=>T |
| nad1 | 493  | 165 | 168 | CGT (R) => TGT (C) | 1    | C=>T |
| nad1 | 500  | 167 | 170 | TCG (S) => TTG (L) | 0.7  | C=>T |
| nad1 | 536  | 179 | 182 | TCC (S) => TTC (F) | 1    | C=>T |
| nad1 | 674  | 225 | 228 | TCT (S) => TTT (F) | 0.9  | C=>T |
| nad1 | 734  | 245 | 248 | TCG (S) => TTG (L) | 0.9  | C=>T |
| nad1 | 740  | 247 | 250 | TCT (S) => TTT (F) | 1    | C=>T |
| nad1 | 743  | 248 | 251 | CCA (P) => CTA (L) | 1    | C=>T |
| nad1 | 755  | 252 | 255 | CCG (P) => CTG (L) | 1    | C=>T |
| nad1 | 779  | 260 | 263 | TCC (S) => TTC (F) | 0.9  | C=>T |
| nad1 | 830  | 277 | 280 | CCG (P) => CTG (L) | 1    | C=>T |
| nad1 | 898  | 300 | 303 | CGG (R) => TGG (W) | 1    | C=>T |
| nad1 | 928  | 310 | 313 | CGG (R) => TGG (W) | 1    | C=>T |
| nad2 | 26   | 9   | 10  | TCC (S) => TTC (F) | 0.89 | C=>T |
| nad2 | 262  | 88  | 89  | CTT (L) => TTT (F) | 0.56 | C=>T |
| nad2 | 356  | 119 | 120 | TCA (S) => TTA (L) | 1    | C=>T |
| nad2 | 361  | 121 | 122 | CCT (P) => TCT (S) | 1    | C=>T |
| nad2 | 367  | 123 | 124 | CGC (R) => TGC (C) | 1    | C=>T |
| nad2 | 394  | 132 | 133 | CAT (H) => TAT (Y) | 1    | C=>T |
| nad2 | 401  | 134 | 135 | TCA (S) => TTA (L) | 1    | C=>T |
| nad2 | 428  | 143 | 144 | CCT (P) => CTT (L) | 1    | C=>T |
| nad2 | 497  | 166 | 167 | TCG (S) => TTG (L) | 1    | C=>T |
| nad2 | 788  | 263 | 267 | TCT (S) => TTT (F) | 0.67 | C=>T |
| nad2 | 928  | 310 | 314 | CAT (H) => TAT (Y) | 1    | C=>T |
| nad2 | 958  | 320 | 324 | CGT (R) => TGT (C) | 0.78 | C=>T |
| nad2 | 962  | 321 | 325 | ACT (T) => ATT (I) | 1    | C=>T |
| nad2 | 1028 | 343 | 347 | TCA (S) => TTA (L) | 0.78 | C=>T |

|      |      |     |     |                    |      |      |
|------|------|-----|-----|--------------------|------|------|
| nad2 | 1058 | 353 | 357 | TCA (S) => TTA (L) | 1    | C=>T |
| nad2 | 1247 | 416 | 420 | CCA (P) => CTA (L) | 0.67 | C=>T |
| nad2 | 1276 | 426 | 430 | CGT (R) => TGT (C) | 1    | C=>T |
| nad2 | 1400 | 467 | 471 | TCA (S) => TTA (L) | 0.67 | C=>T |
| nad2 | 1403 | 468 | 472 | TCC (S) => TTC (F) | 1    | C=>T |
| nad2 | 1409 | 470 | 474 | TCA (S) => TTA (L) | 1    | C=>T |
| nad3 | 146  | 49  | 50  | TCC (S) => TTC (F) | 1    | C=>T |
| nad3 | 208  | 70  | 71  | CTT (L) => TTT (F) | 0.95 | C=>T |
| nad3 | 266  | 89  | 90  | CCG (P) => CTG (L) | 1    | C=>T |
| nad3 | 275  | 92  | 93  | TCT (S) => TTT (F) | 1    | C=>T |
| nad3 | 344  | 115 | 116 | TCG (S) => TTG (L) | 1    | C=>T |
| nad3 | 349  | 117 | 118 | CGG (R) => TGG (W) | 1    | C=>T |
| nad4 | 29   | 10  | 10  | TCT (S) => TTT (F) | 0.67 | C=>T |
| nad4 | 44   | 15  | 15  | CCT (P) => CTT (L) | 1    | C=>T |
| nad4 | 74   | 25  | 25  | ACT (T) => ATT (I) | 0.89 | C=>T |
| nad4 | 107  | 36  | 36  | TCG (S) => TTG (L) | 1    | C=>T |
| nad4 | 158  | 53  | 53  | CCT (P) => CTT (L) | 1    | C=>T |
| nad4 | 166  | 56  | 56  | CGG (R) => TGG (W) | 1    | C=>T |
| nad4 | 197  | 66  | 66  | TCT (S) => TTT (F) | 1    | C=>T |
| nad4 | 362  | 121 | 121 | ACA (T) => ATA (I) | 0.89 | C=>T |
| nad4 | 368  | 123 | 123 | TCT (S) => TTT (F) | 1    | C=>T |
| nad4 | 376  | 126 | 126 | CGT (R) => TGT (C) | 0.78 | C=>T |
| nad4 | 433  | 145 | 145 | CTT (L) => TTT (F) | 1    | C=>T |
| nad4 | 436  | 146 | 146 | CCC (P) => TTC (F) | 0.89 | C=>T |
| nad4 | 437  | 146 | 146 | CCC (P) => TTC (F) | 0.89 | C=>T |
| nad4 | 449  | 150 | 150 | CCA (P) => CTA (L) | 1    | C=>T |
| nad4 | 577  | 193 | 193 | CTC (L) => TTC (F) | 0.67 | C=>T |
| nad4 | 608  | 203 | 203 | TCA (S) => TTA (L) | 1    | C=>T |
| nad4 | 836  | 279 | 279 | TCC (S) => TTC (F) | 1    | C=>T |
| nad4 | 887  | 296 | 296 | TCG (S) => TTG (L) | 1    | C=>T |
| nad4 | 896  | 299 | 299 | TCA (S) => TTA (L) | 0.89 | C=>T |
| nad4 | 977  | 326 | 326 | CCG (P) => CTG (L) | 0.78 | C=>T |
| nad4 | 1010 | 337 | 337 | CCG (P) => CTG (L) | 1    | C=>T |
| nad4 | 1016 | 339 | 339 | TCA (S) => TTA (L) | 1    | C=>T |
| nad4 | 1129 | 377 | 377 | CTC (L) => TTC (F) | 1    | C=>T |
| nad4 | 1148 | 383 | 383 | TCT (S) => TTT (F) | 0.89 | C=>T |
| nad4 | 1172 | 391 | 391 | TCA (S) => TTA (L) | 1    | C=>T |
| nad4 | 1211 | 404 | 404 | TCA (S) => TTA (L) | 1    | C=>T |
| nad4 | 1307 | 436 | 436 | GCG (A) => GTG (V) | 1    | C=>T |
| nad4 | 1355 | 452 | 452 | CCA (P) => CTA (L) | 1    | C=>T |
| nad4 | 1405 | 469 | 469 | CGG (R) => TGG (W) | 1    | C=>T |
| nad4 | 1433 | 478 | 478 | CCG (P) => CTG (L) | 1    | C=>T |

|       |      |     |     |                    |      |      |
|-------|------|-----|-----|--------------------|------|------|
| nad4  | 1438 | 480 | 480 | CGC (R) => TGC (C) | 1    | C=>T |
| nad4L | 17   | 6   | 16  | TCA (S) => TTA (L) | 1    | C=>T |
| nad4L | 25   | 9   | 19  | CGG (R) => TGG (W) | 1    | C=>T |
| nad4L | 65   | 22  | 32  | TCA (S) => TTA (L) | 1    | C=>T |
| nad4L | 80   | 27  | 37  | TCA (S) => TTA (L) | 1    | C=>T |
| nad4L | 101  | 34  | 44  | TCG (S) => TTG (L) | 0.88 | C=>T |
| nad4L | 128  | 43  | 53  | TCG (S) => TTG (L) | 1    | C=>T |
| nad4L | 167  | 56  | 66  | TCA (S) => TTA (L) | 0.88 | C=>T |
| nad4L | 251  | 84  | 94  | TCT (S) => TTT (F) | 0.88 | C=>T |
| nad5  | 242  | 81  | 81  | CCG (P) => CTG (L) | 1    | C=>T |
| nad5  | 358  | 120 | 120 | CTT (L) => TTT (F) | 1    | C=>T |
| nad5  | 374  | 125 | 125 | CCA (P) => CTA (L) | 0.9  | C=>T |
| nad5  | 398  | 133 | 133 | TCT (S) => TTT (F) | 0.9  | C=>T |
| nad5  | 539  | 180 | 180 | CCT (P) => CTT (L) | 1    | C=>T |
| nad5  | 548  | 183 | 183 | TCG (S) => TTG (L) | 0.4  | C=>T |
| nad5  | 598  | 200 | 200 | CGT (R) => TGT (C) | 1    | C=>T |
| nad5  | 629  | 210 | 214 | TCT (S) => TTT (F) | 0.9  | C=>T |
| nad5  | 713  | 238 | 242 | TCG (S) => TTG (L) | 1    | C=>T |
| nad5  | 835  | 279 | 283 | CCA (P) => TCA (S) | 0.9  | C=>T |
| nad5  | 1550 | 517 | 521 | ACC (T) => ATC (I) | 0.9  | C=>T |
| nad5  | 1580 | 527 | 531 | TCA (S) => TTA (L) | 0.8  | C=>T |
| nad5  | 1610 | 537 | 541 | CCC (P) => CTC (L) | 0.7  | C=>T |
| nad5  | 1916 | 639 | 643 | TCT (S) => TTT (F) | 0.7  | C=>T |
| nad5  | 1918 | 640 | 644 | CGT (R) => TGT (C) | 0.7  | C=>T |
| nad5  | 1958 | 653 | 657 | TCG (S) => TTG (L) | 0.9  | C=>T |
| nad6  | 7    | 3   | 5   | CTT (L) => TTT (F) | 1    | C=>T |
| nad6  | 26   | 9   | 11  | CCT (P) => CTT (L) | 0.4  | C=>T |
| nad6  | 83   | 28  | 30  | TCG (S) => TTG (L) | 1    | C=>T |
| nad6  | 88   | 30  | 32  | CCC (P) => TTC (F) | 0.7  | C=>T |
| nad6  | 89   | 30  | 32  | CCC (P) => TTC (F) | 0.7  | C=>T |
| nad6  | 95   | 32  | 34  | CCA (P) => CTA (L) | 1    | C=>T |
| nad6  | 103  | 35  | 37  | CGC (R) => TGC (C) | 1    | C=>T |
| nad6  | 146  | 49  | 51  | TCC (S) => TTC (F) | 1    | C=>T |
| nad6  | 161  | 54  | 56  | CCA (P) => CTA (L) | 1    | C=>T |
| nad6  | 169  | 57  | 59  | CAT (H) => TAT (Y) | 1    | C=>T |
| nad6  | 191  | 64  | 66  | TCA (S) => TTA (L) | 1    | C=>T |
| nad7  | 77   | 26  | 26  | TCA (S) => TTA (L) | 1    | C=>T |
| nad7  | 209  | 70  | 70  | TCA (S) => TTA (L) | 0.88 | C=>T |
| nad7  | 224  | 75  | 75  | ACG (T) => ATG (M) | 1    | C=>T |
| nad7  | 244  | 82  | 82  | CAT (H) => TAT (Y) | 1    | C=>T |
| nad7  | 251  | 84  | 84  | TCA (S) => TTA (L) | 1    | C=>T |
| nad7  | 316  | 106 | 106 | CGT (R) => TGT (C) | 1    | C=>T |

|      |      |     |     |                    |      |      |
|------|------|-----|-----|--------------------|------|------|
| nad7 | 335  | 112 | 112 | TCA (S) => TTA (L) | 0.88 | C=>T |
| nad7 | 344  | 115 | 115 | TCA (S) => TTA (L) | 1    | C=>T |
| nad7 | 392  | 131 | 131 | TCC (S) => TTC (F) | 1    | C=>T |
| nad7 | 404  | 135 | 135 | TCT (S) => TTT (F) | 1    | C=>T |
| nad7 | 578  | 193 | 193 | TCA (S) => TTA (L) | 0.88 | C=>T |
| nad7 | 679  | 227 | 227 | CCA (P) => TCA (S) | 0.88 | C=>T |
| nad7 | 769  | 257 | 257 | CGC (R) => TGC (C) | 1    | C=>T |
| nad7 | 836  | 279 | 280 | CCT (P) => CTT (L) | 1    | C=>T |
| nad7 | 926  | 309 | 310 | TCA (S) => TTA (L) | 0.88 | C=>T |
| nad7 | 1057 | 353 | 354 | CGT (R) => TGT (C) | 1    | C=>T |
| nad7 | 1088 | 363 | 364 | TCA (S) => TTA (L) | 1    | C=>T |
| nad7 | 1103 | 368 | 369 | TCT (S) => TTT (F) | 1    | C=>T |
| nad7 | 1124 | 375 | 376 | CCA (P) => CTA (L) | 1    | C=>T |
| nad7 | 1166 | 389 | 390 | TCT (S) => TTT (F) | 1    | C=>T |
| nad9 | 92   | 31  | 31  | TCT (S) => TTT (F) | 0.75 | C=>T |
| nad9 | 298  | 100 | 100 | CCG (P) => TCG (S) | 0.83 | C=>T |
| nad9 | 328  | 110 | 110 | CGG (R) => TGG (W) | 1    | C=>T |
| nad9 | 398  | 133 | 133 | TCA (S) => TTA (L) | 1    | C=>T |
| nad9 | 439  | 147 | 147 | CTT (L) => TTT (F) | 1    | C=>T |
| nad9 | 539  | 180 | 180 | TCT (S) => TTT (F) | 1    | C=>T |
| rpl5 | 35   | 12  | 17  | TCA (S) => TTA (L) | 0.78 | C=>T |
| rpl5 | 47   | 16  | 21  | CCG (P) => CTG (L) | 1    | C=>T |
| rpl5 | 64   | 22  | 27  | CAC (H) => TAC (Y) | 1    | C=>T |
| rpl5 | 170  | 57  | 63  | CCG (P) => CTG (L) | 0.44 | C=>T |
| rpl5 | 320  | 107 | 121 | TCG (S) => TTG (L) | 0.89 | C=>T |
| rpl5 | 332  | 111 | 125 | TCG (S) => TTG (L) | 0.44 | C=>T |
| rpl5 | 518  | 173 | 189 | CCG (P) => CTG (L) | 1    | C=>T |
| rps3 | 326  | 109 | 178 | TCA (S) => TTA (L) | 0.71 | C=>T |
| rps3 | 512  | 171 | 256 | TCG (S) => TTG (L) | 0.86 | C=>T |
| rps3 | 817  | 273 | 367 | CTT (L) => TTT (F) | 1    | C=>T |
| rps3 | 1160 | 387 | 486 | CCG (P) => CTG (L) | 1    | C=>T |
| rps3 | 1187 | 396 | 495 | CCG (P) => CTG (L) | 0.86 | C=>T |
| rps4 | 38   | 13  | 26  | CCA (P) => CTA (L) | 0.5  | C=>T |
| rps4 | 49   | 17  | 30  | CGG (R) => TGG (W) | 1    | C=>T |
| rps4 | 133  | 45  | 59  | CCG (P) => TCG (S) | 0.67 | C=>T |
| rps4 | 164  | 55  | 69  | TCA (S) => TTA (L) | 1    | C=>T |
| rps4 | 184  | 62  | 76  | CCC (P) => TCC (S) | 0.83 | C=>T |
| rps4 | 193  | 65  | 79  | CAT (H) => TAT (Y) | 1    | C=>T |
| rps4 | 266  | 89  | 103 | CCA (P) => CTA (L) | 0.83 | C=>T |
| rps4 | 290  | 97  | 111 | CCG (P) => CTG (L) | 0.83 | C=>T |
| rps4 | 335  | 112 | 126 | CCG (P) => CTG (L) | 1    | C=>T |
| rps4 | 482  | 161 | 175 | TCA (S) => TTA (L) | 1    | C=>T |

|       |      |     |     |                    |      |      |
|-------|------|-----|-----|--------------------|------|------|
| rps4  | 868  | 290 | 329 | CCT (P) => TCT (S) | 0.2  | C=>T |
| rps4  | 934  | 312 | 354 | CAT (H) => TAT (Y) | 0.83 | C=>T |
| rps4  | 959  | 320 | 362 | TCT (S) => TTT (F) | 1    | C=>T |
| rps4  | 1010 | 337 | 379 | CCA (P) => CTA (L) | 0.83 | C=>T |
| rps4  | 1019 | 340 | 382 | CCT (P) => CTT (L) | 1    | C=>T |
| rps4  | 1024 | 342 | 384 | CGG (R) => TGG (W) | 1    | C=>T |
| rps7  | 341  | 114 | 136 | TCA (S) => TTA (L) | 0.88 | C=>T |
| rps10 | 268  | 90  | 95  | CTT (L) => TTT (F) | 0.8  | C=>T |
| rps10 | 272  | 91  | 96  | GCA (A) => GTA (V) | 0.2  | C=>T |
| rps12 | 71   | 24  | 24  | TCG (S) => TTG (L) | 0.94 | C=>T |
| rps12 | 100  | 34  | 34  | CGC (R) => TGC (C) | 1    | C=>T |
| rps12 | 104  | 35  | 35  | CCG (P) => CTG (L) | 1    | C=>T |
| rps12 | 196  | 66  | 66  | CAC (H) => TAC (Y) | 0.94 | C=>T |
| rps12 | 269  | 90  | 90  | TCG (S) => TTG (L) | 0.94 | C=>T |
| rps12 | 284  | 95  | 95  | TCC (S) => TTC (F) | 0.76 | C=>T |
| rps13 | 5    | 2   | 6   | TCA (S) => TTA (L) | 0.6  | C=>T |

**Table S14. Primer sequences used for RNA editing evaluation.**

|      | Gene name-editing site | Forward primer(5'-3') | Reverse primer(5'-3') |
|------|------------------------|-----------------------|-----------------------|
| gDNA | <i>cox2-443</i>        | GAGTAGGCGTGGAGAG      | GTTCGTTATCCTAACCG     |
|      | <i>nad1-2</i>          | GGTAAGAGGATTCGATCTTG  | GTTCGGATCTGACAATACC   |
|      | <i>nad7-224</i>        | GTGAGTTCTTCGTTCCG     | GTGCCACTCCACCTG       |
|      | <i>atp6-1015</i>       | GCTTGGACTATGCTATGTATG | GGCTTGTGCAGTTCAG      |
| cDNA | <i>cox2-443</i>        | ATGATTGTTCTAGAATGGC   | ACGACCAGGTACAGC       |
|      | <i>nad1-2</i>          | GTGAGGCAGGCTAAG       | GTTCGGATCTGACAATACC   |
|      | <i>nad7-224</i>        | ATGACGACTAGGAACAGGC   | TGTGCCACTCCACCTG      |
|      | <i>atp6-1015</i>       | GTACTCCTTGAGCTAATCC   | GTTGGTCCGACCAGC       |

**Table S15. The NCBI accession numbers of all used plant mitogenomes.**

|               |                                                                            |             |
|---------------|----------------------------------------------------------------------------|-------------|
| Caryophyllale | <i>Myricaria elegans</i> Royle M1 and 2, complete genome                   | OP429118.1  |
|               |                                                                            | OP429117.1  |
|               | <i>Alternanthera philoxeroides</i> mitochondrion, complete genome          | MN166292.1  |
|               | <i>Beta macrocarpa</i> mitochondrion, complete genome                      | NC_015994.1 |
|               | <i>Beta vulgaris</i> subsp. <i>maritima</i> mitochondrion, complete genome | NC_015099.1 |
|               | <i>Bougainvillea spectabilis</i> mitochondrion, complete genome            | NC_056281.1 |
|               | <i>Agrostemma githago</i> mitochondrion, complete genome                   | NC_057604.1 |
|               | <i>Mirabilis jalapa</i> mitochondrion, complete genome                     | NC_056991.1 |
|               | <i>Mirabilis himalaica</i> mitochondrion, complete genome                  | NC_048974.1 |
|               | <i>Chenopodium quinoa</i> mitochondrion, complete genome                   | NC_041093.1 |
|               | <i>Sesuvium portulacastrum</i> mitochondrion, complete genome              | MN683736.1  |
|               | <i>Silene latifolia</i> mitochondrion, complete genome                     | NC_014487.1 |
|               | <i>Spinacia oleracea</i> mitochondrion, complete genome                    | NC_035618.1 |
|               | <i>Suaeda glauca</i> mitochondrion, complete sequence                      | NC_060419.1 |
| Asterales     | <i>Tetragonia tetragonoides</i> mitochondrion, complete genome             | MW971440.1  |
|               | <i>Chrysanthemum boreale</i> mitochondrion, complete genome                | NC_039757.1 |
|               | <i>Codonopsis lanceolata</i> mitochondrion, complete genome                | NC_037949.1 |
|               | <i>Helianthus annuus</i> mitochondrion, complete genome                    | NC_023337.1 |
|               | <i>Helianthus occidentalis</i> mitochondrion, complete genome              | NC_058584.1 |
|               | <i>Lactuca serriola</i> mitochondrion, complete genome                     | NC_042378.1 |
|               | <i>Lactuca saligna</i> strain CGN5271 mitochondrion, complete geno         | NC_042406.1 |
|               | <i>Platycodon grandiflorus</i> mitochondrion, complete genome              | NC_035958.1 |
|               | <i>Arctium tomentosum</i> mitochondrion, complete genome                   | NC_058643.1 |
|               | <i>Arctium lappa</i> mitochondrion, complete genome                        | NC_058644.1 |
|               | <i>Ageratum conyzoides</i> mitochondrion, complete genome                  | NC_053927.1 |
|               | <i>Bidens tripartita</i> mitochondrion, complete genome                    | NC_062671.1 |
|               | <i>Saussurea costus</i> mitochondrion, complete genome                     | NC_059793.1 |
| Aquifoliales  | <i>Ilex pubescens</i> mitochondrion, complete genome                       | NC_045078.1 |
| Santalales    | <i>Malania oleifera</i> mitochondrion, complete genome                     | NC_053625.1 |
|               | <i>Tolypanthus maclurei</i> mitochondrion, complete genome                 | NC_056836.1 |

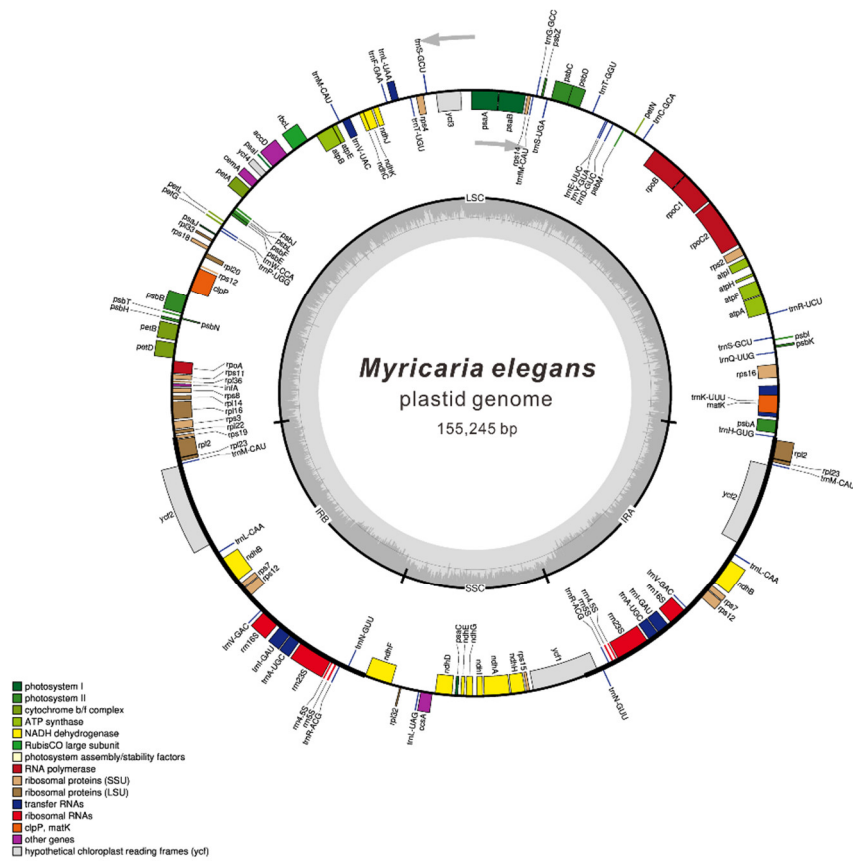

**Figure S1.** The plastid genome map and gene annotations of the *M. elegans*. Annotated genes showed the locations inside/outside the circle and transcribed clockwise/counterclockwise. The GC content was depicted in the inner circle, which was colored in a dark gray.
